# Supplementary material for: Design and Synthesis of Water-Soluble and Potent MMP-13 Inhibitors with Activity in Human Osteosarcoma Cells
Source: MDPI journal article supplement (doi:10.3390/ijms22189976), 2021-09-15
Supplement: s1 [file s1]

## ***Supplementary Materials***

### **Design and synthesis of water-soluble and potent MMP-13 inhibitors with activity in human osteosarcoma cells**

Jose María Zapico,<sup>1</sup> Lourdes Acosta,<sup>1</sup> Myriam Pastor,<sup>1</sup> Loganathan Rangasamy,<sup>1</sup> Laura Márquez-Cantudo,<sup>1</sup> Claire Coderch,<sup>1</sup> Irene Ortín,<sup>1</sup> Maria Nicolau-Sanus,<sup>2</sup> Leonor Puchades-Carrasco,<sup>2</sup> Antonio Pineda-Lucena,<sup>3</sup> Alejandro Majali-Martinez,<sup>1</sup> Pilar Ramos,<sup>1</sup> Beatriz de Pascual-Teresa,<sup>1\*</sup> Ana Ramos.<sup>1\*</sup>

<sup>1</sup> Departamento de Química y Bioquímica, Facultad de Farmacia, Universidad San Pablo-CEU, CEU Universities, Urbanización Montepríncipe, 28925, Alcorcón, Madrid, Spain.

<sup>2</sup> Drug Discovery Unit, Instituto de Investigación Sanitaria La Fe, Valencia, Spain.

<sup>3</sup> Molecular Therapeutics Program, Centro de Investigación Médica Aplicada, Universidad de Navarra, Pamplona, Spain.

### **Table of contents**

|                                                                        |           |
|------------------------------------------------------------------------|-----------|
| <b>PART A. Calibration curves of compounds for solubility studies.</b> | <b>2</b>  |
| <b>PART B. <sup>1</sup>H and <sup>13</sup>C NMR spectra.</b>           | <b>3</b>  |
| <b>PART C. Modeling</b>                                                | <b>13</b> |
| <b>PART D. NMR studies</b>                                             | <b>24</b> |
| <b>PART E. IC<sub>50</sub> calculations</b>                            | <b>25</b> |
| <b>PART F. Purity by HPLC for the final compounds.</b>                 | <b>27</b> |

## PART A. Calibration curves of compounds for solubility studies.

To calculate the solubility of all compounds that showed activity in the enzymatic assay (**1**, **2**, **9a**, **9e**, **10a-e**), 4-points calibration curves were made for each compound. Calibrations curves were obtained using four different concentrations of the corresponding compound (0.1 mg/mL, 0.01 mg/mL, 0.001 mg/mL and 0.0001 mg/mL). All samples were prepared in DMSO and measured in a LC-HRMS (Agilent 1260 Infinity II).

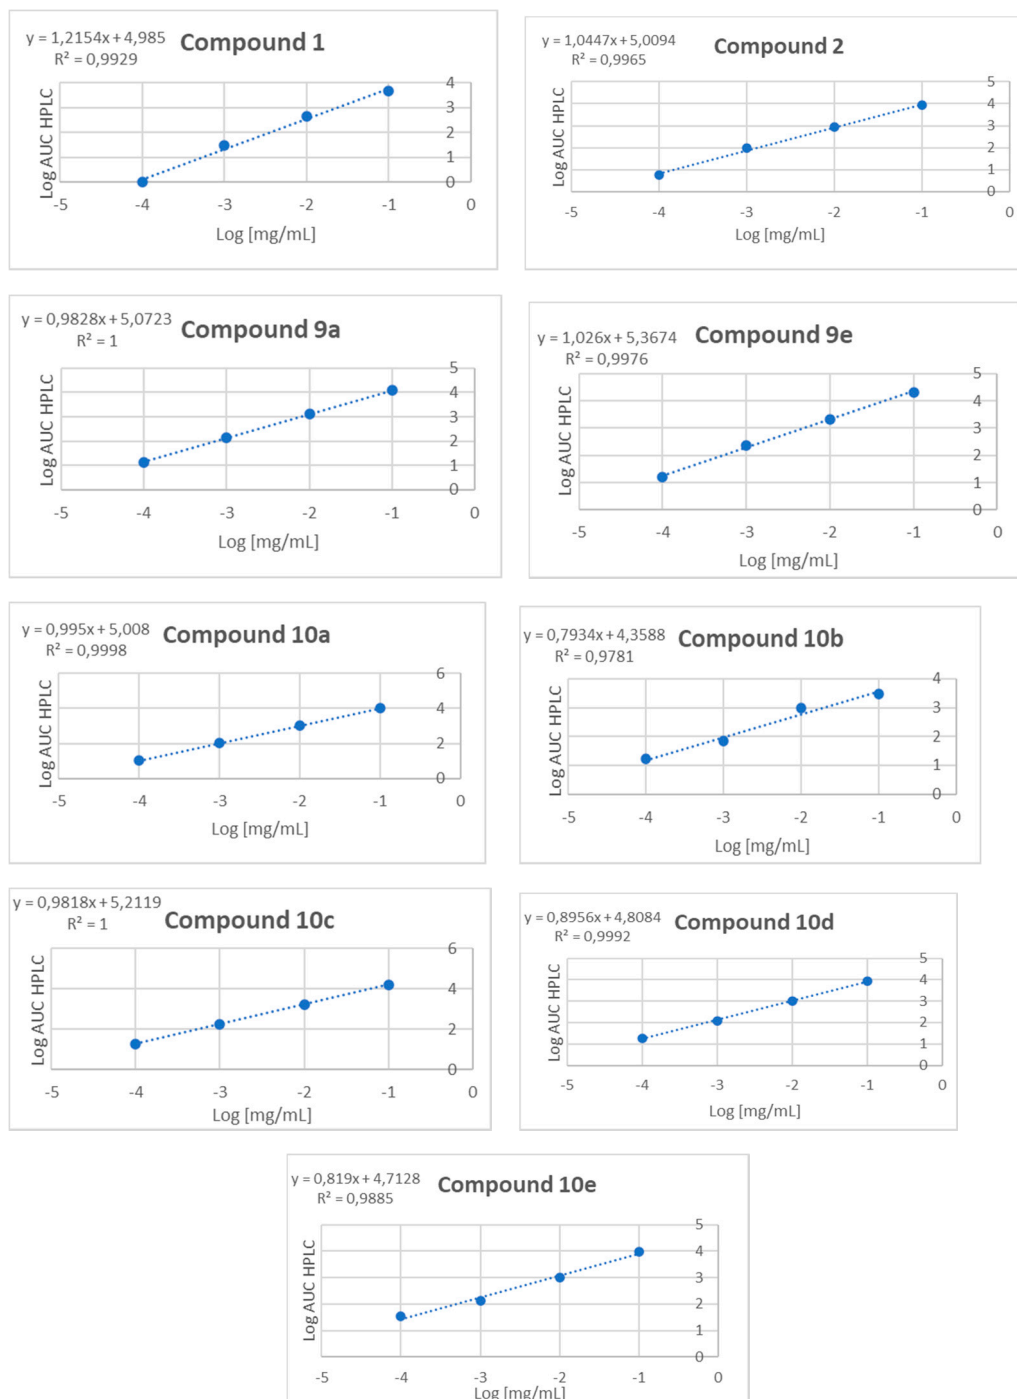

**Figure S1.** Calibration curves of all active compounds (solubility studies) (**1**, **2**, **9a**, **9e**, **10a-e**)

## PART B. $^1\text{H}$ and $^{13}\text{C}$ NMR spectra.

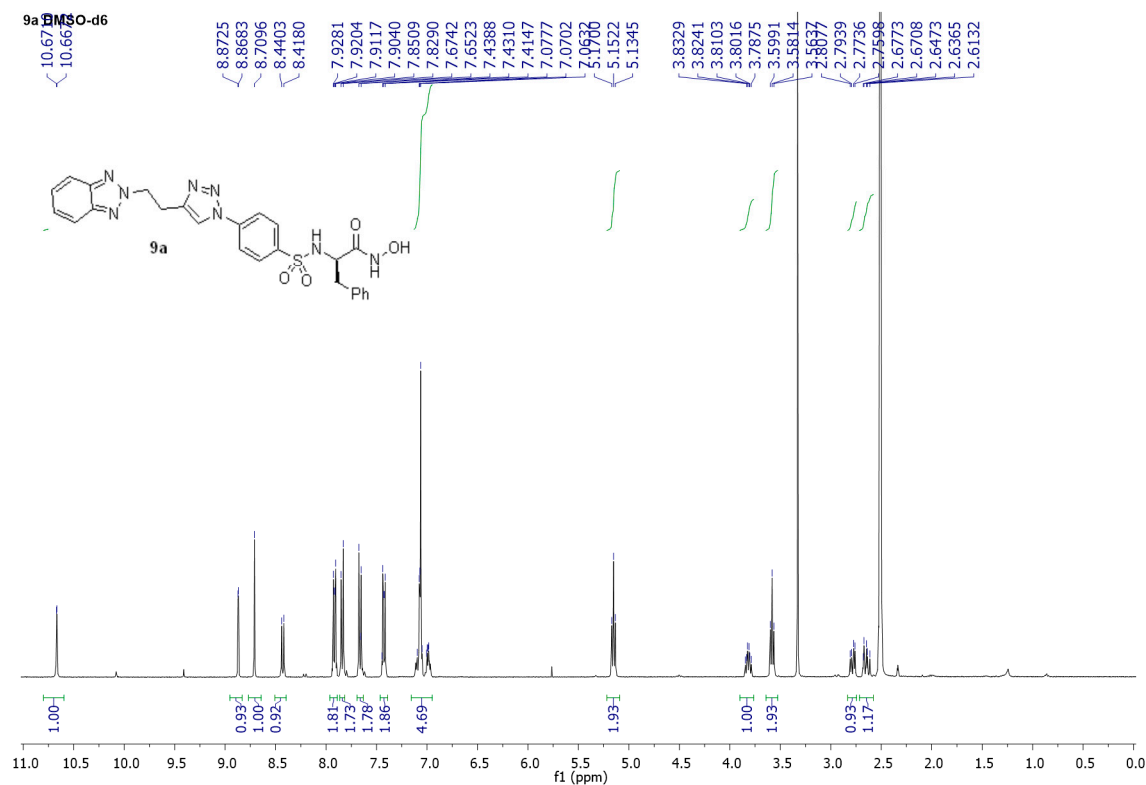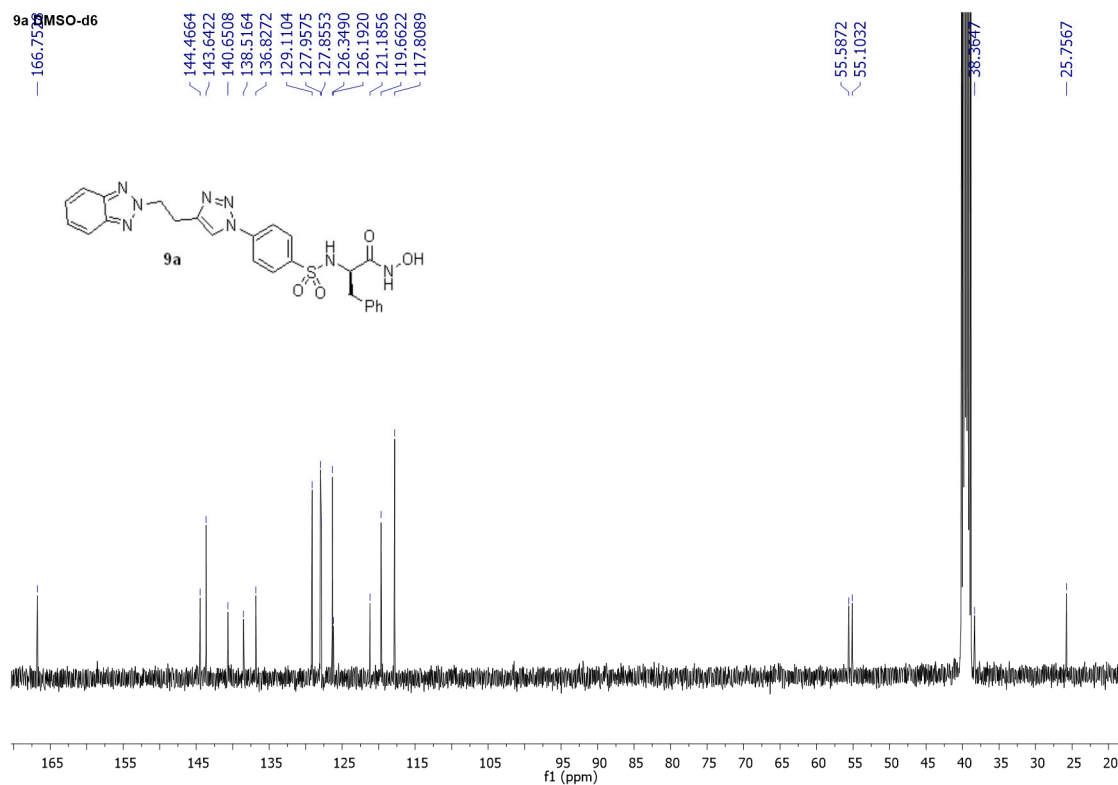

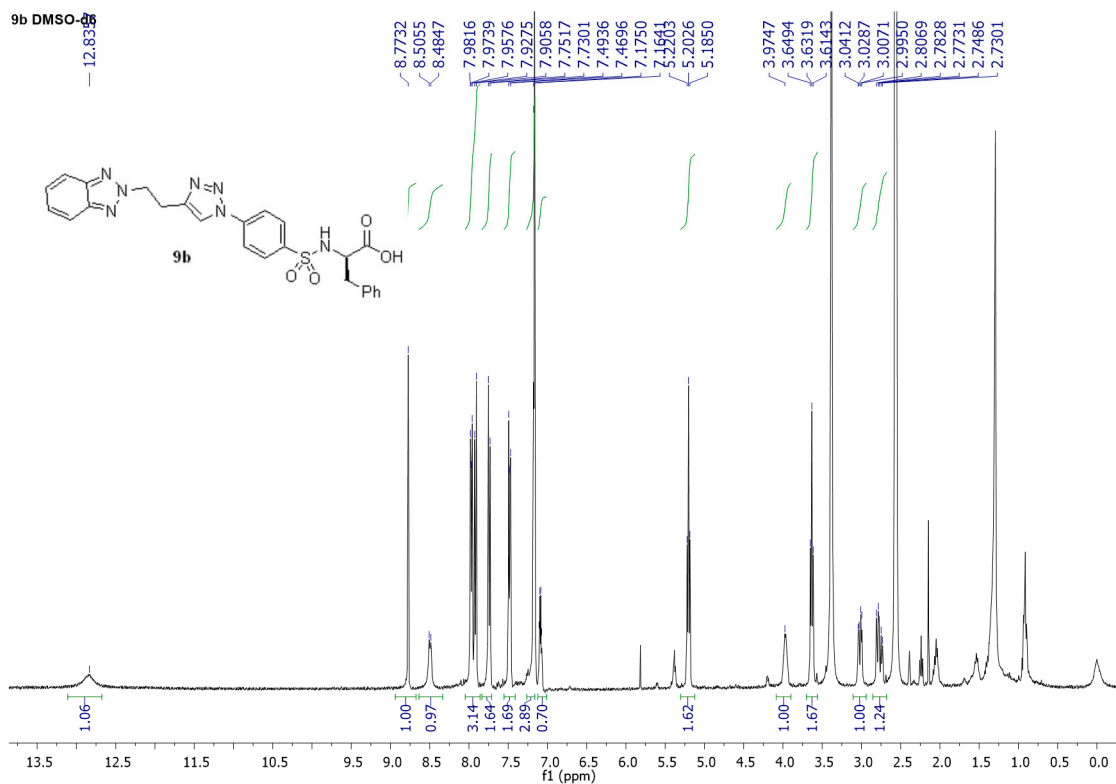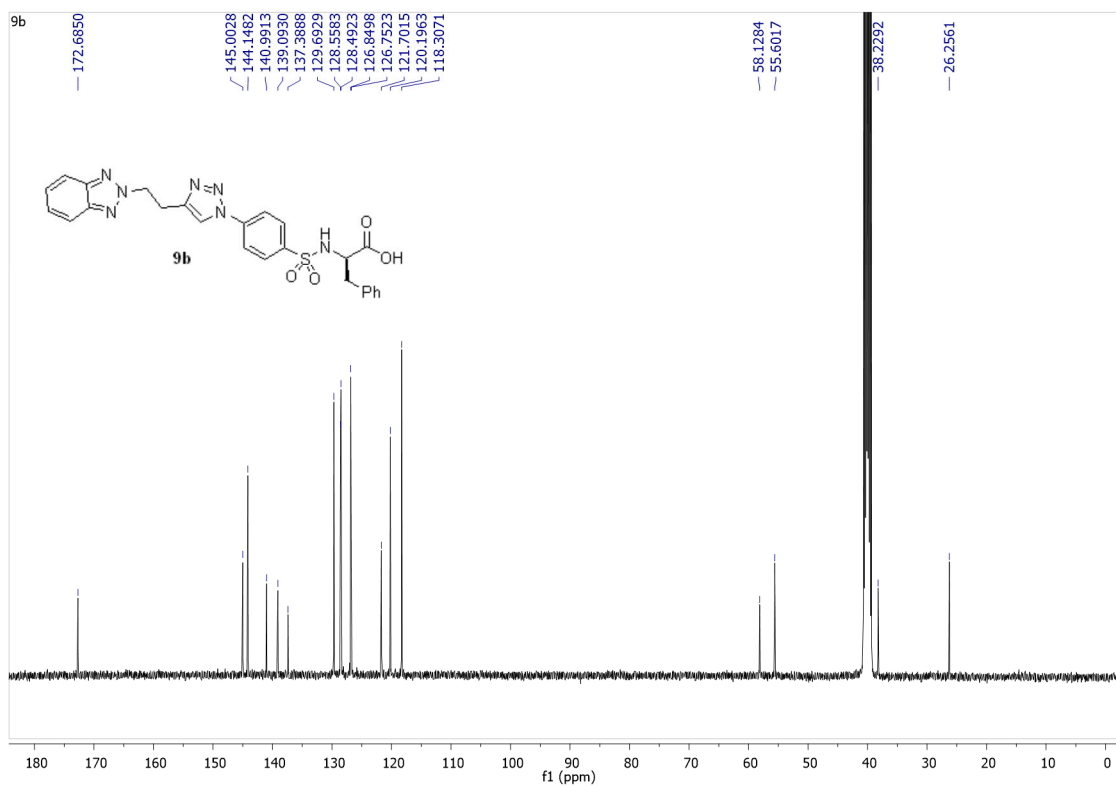



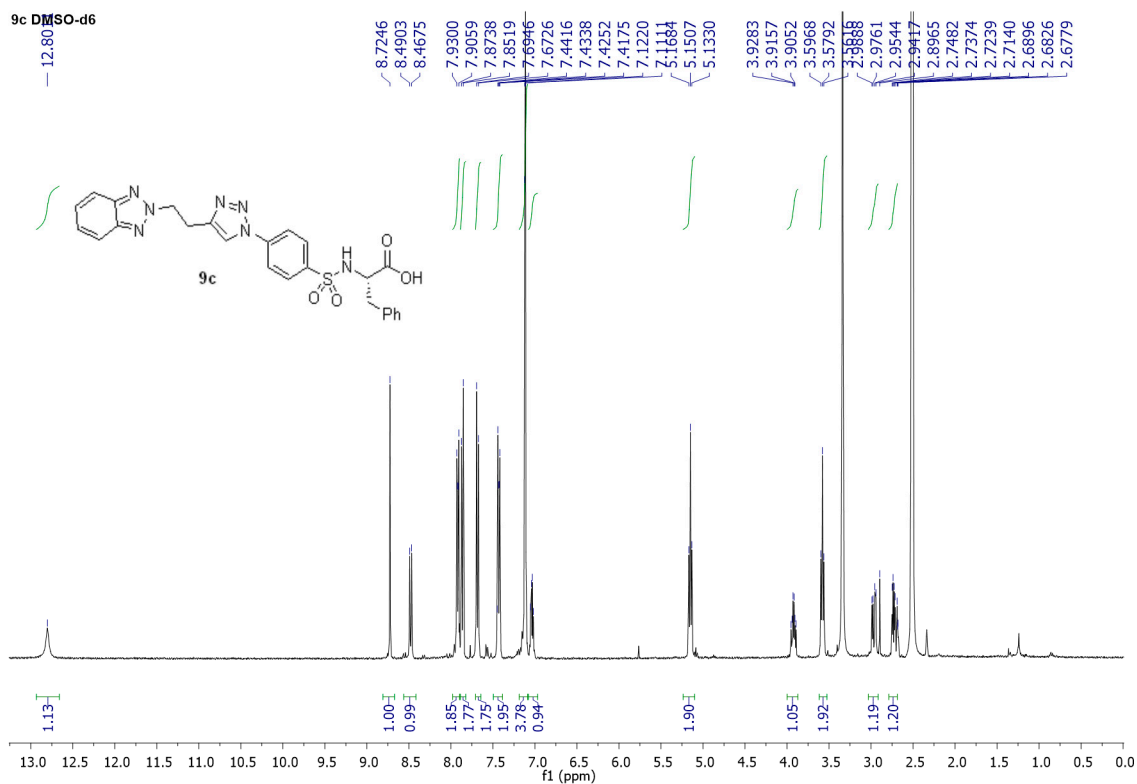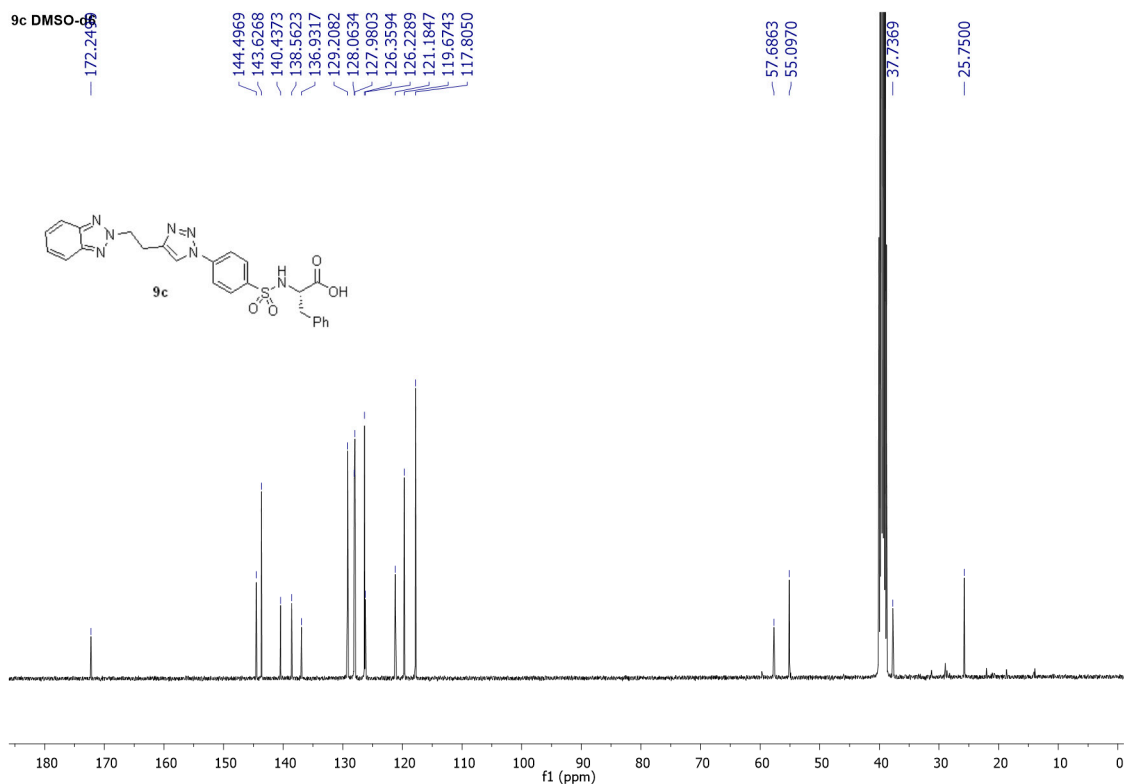



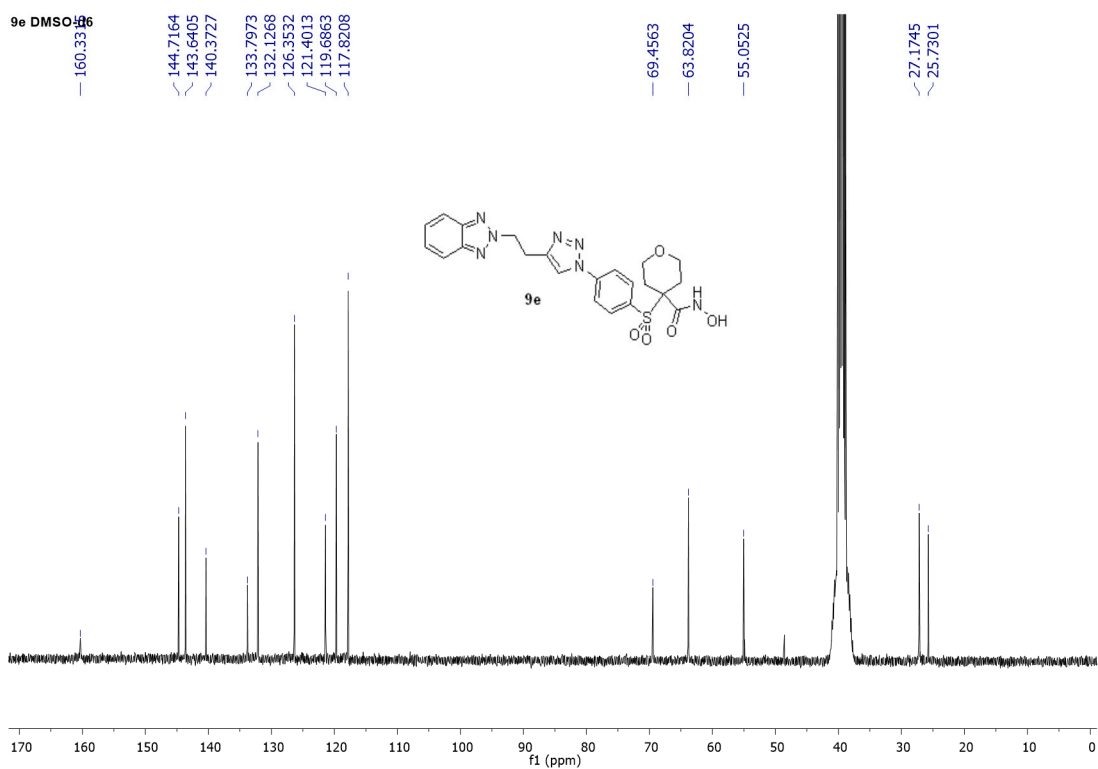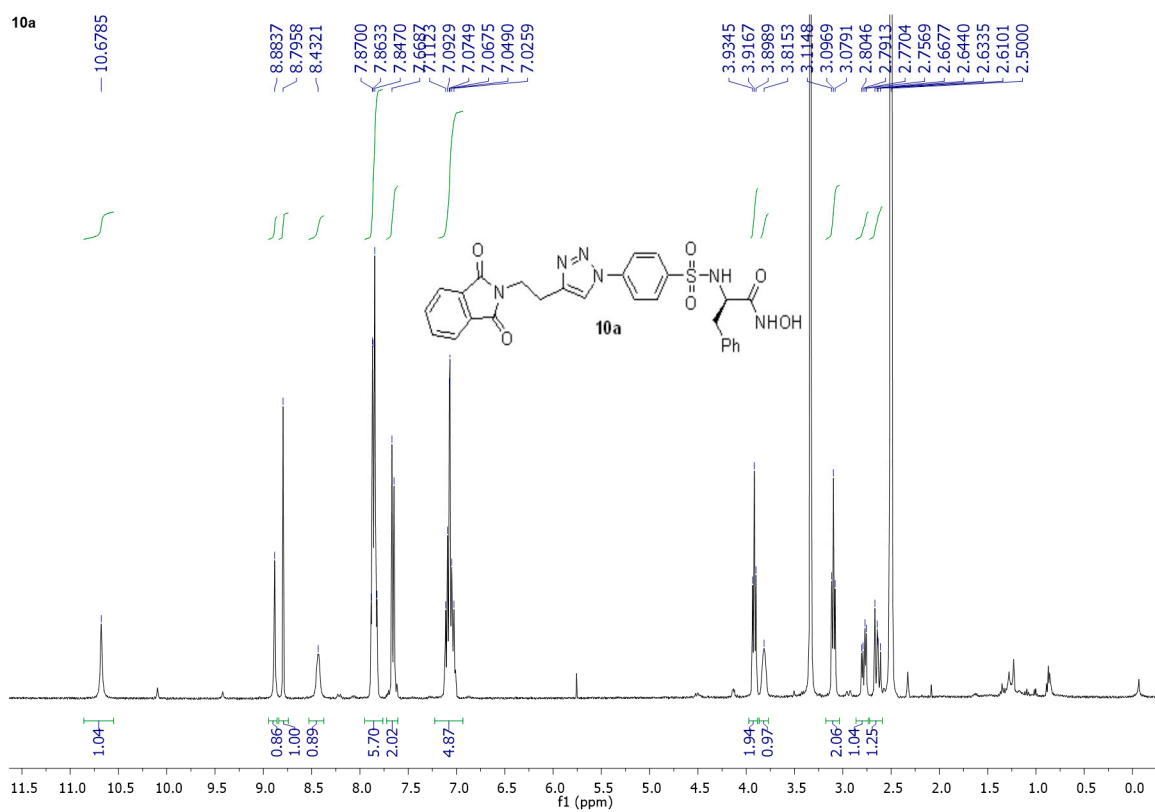

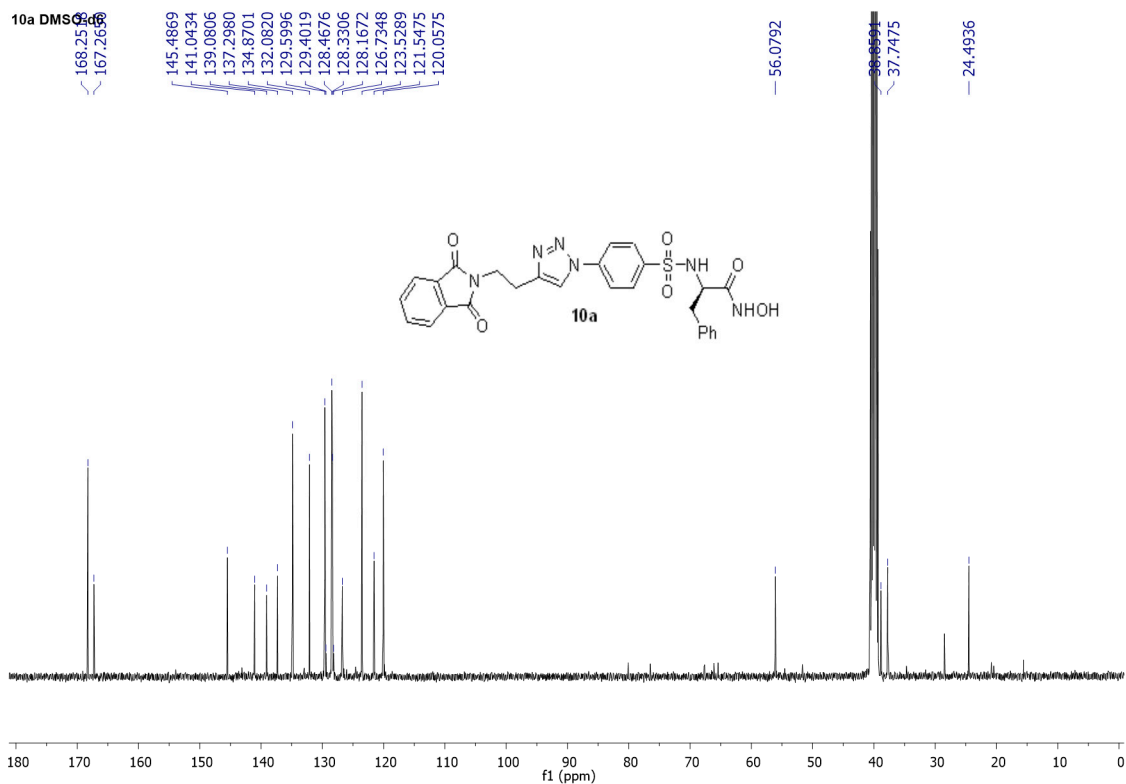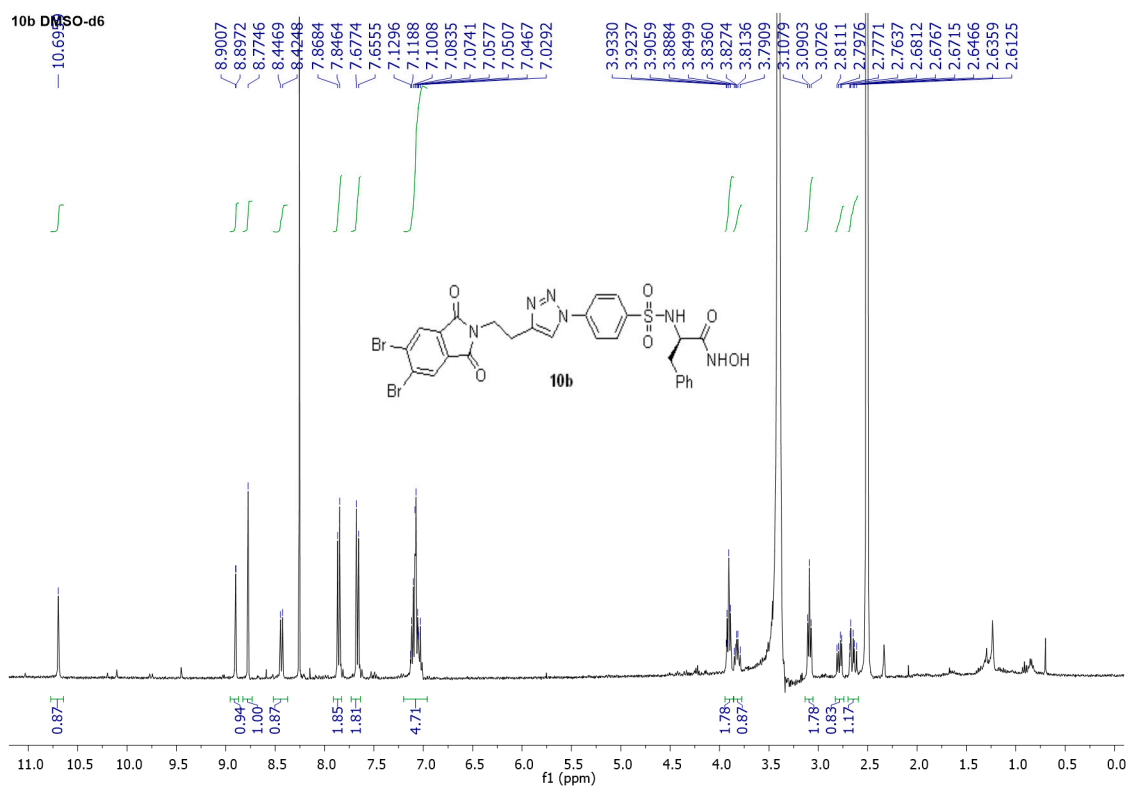

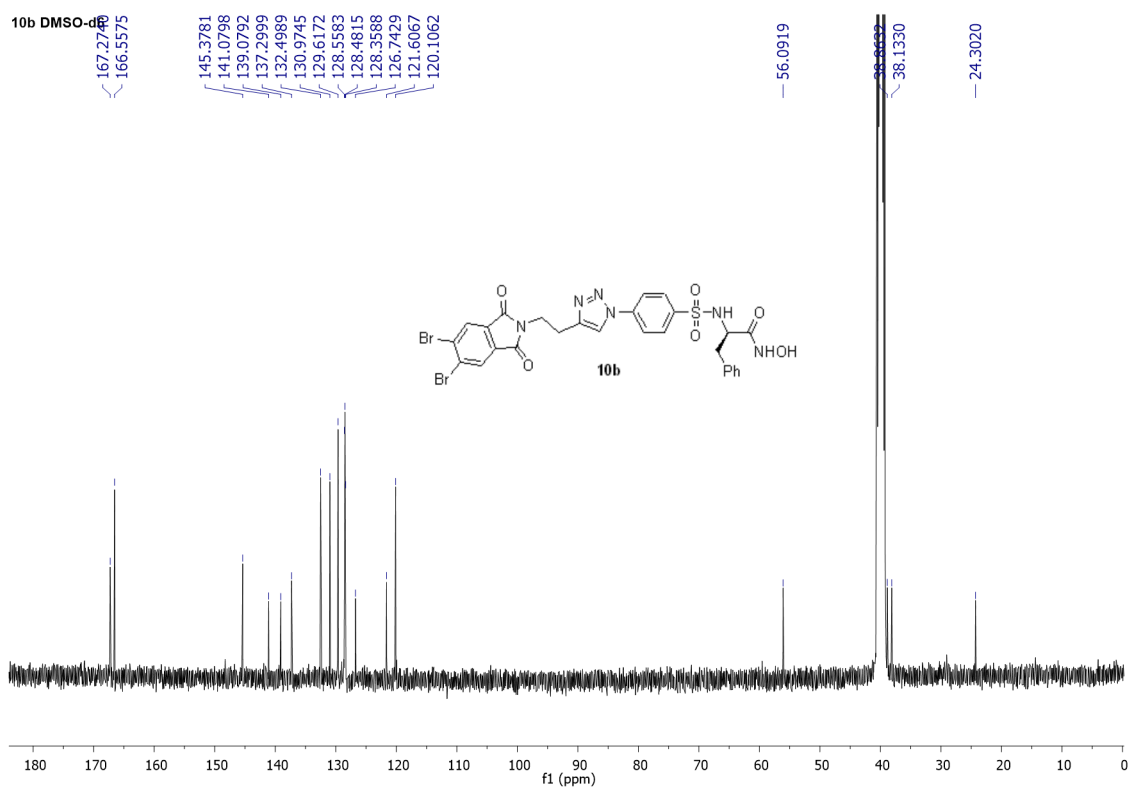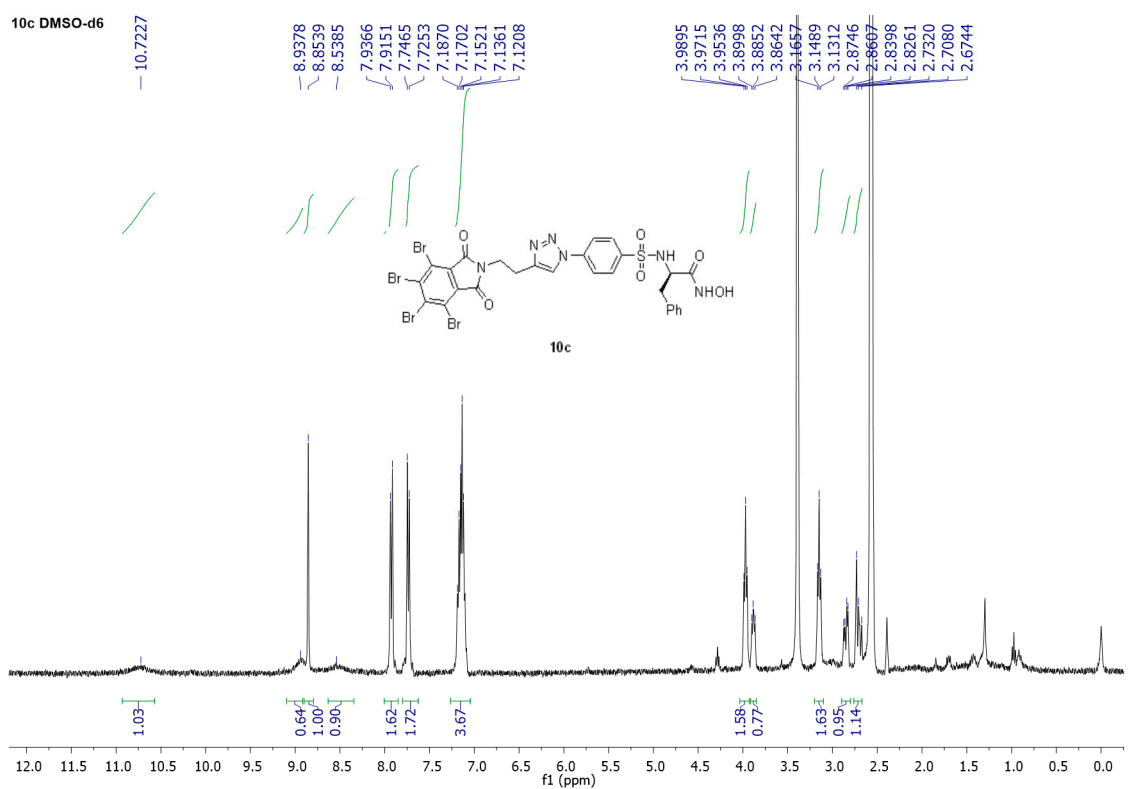

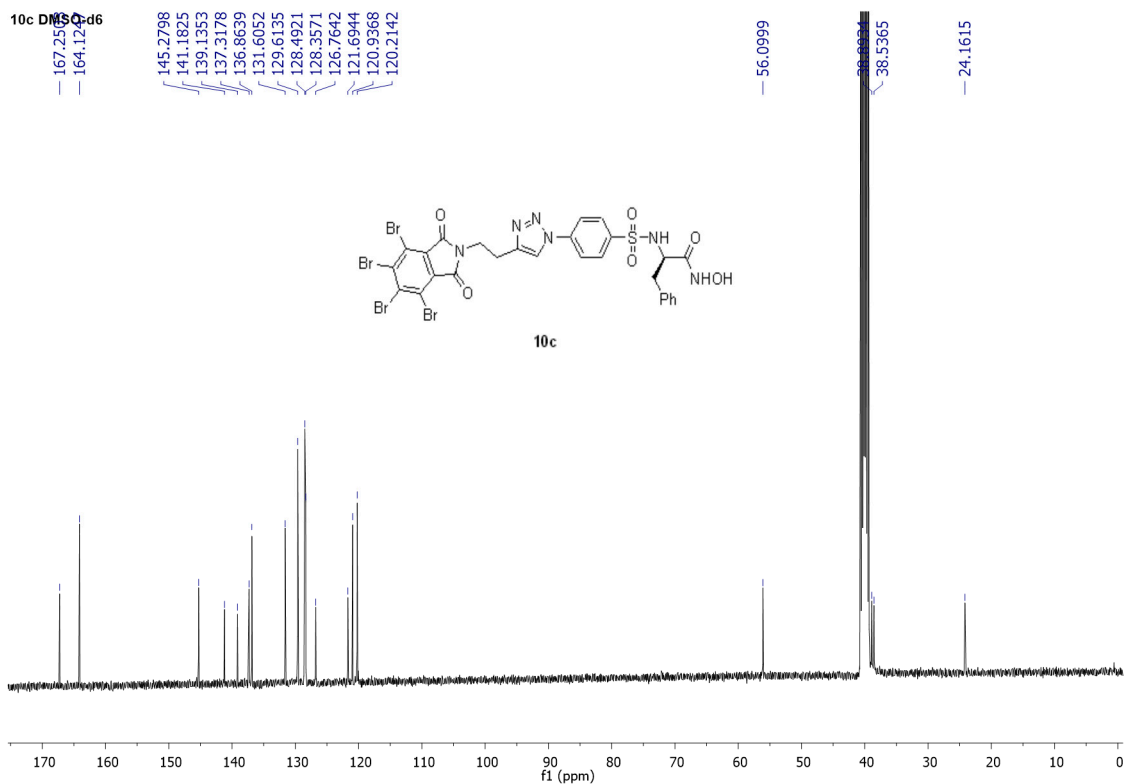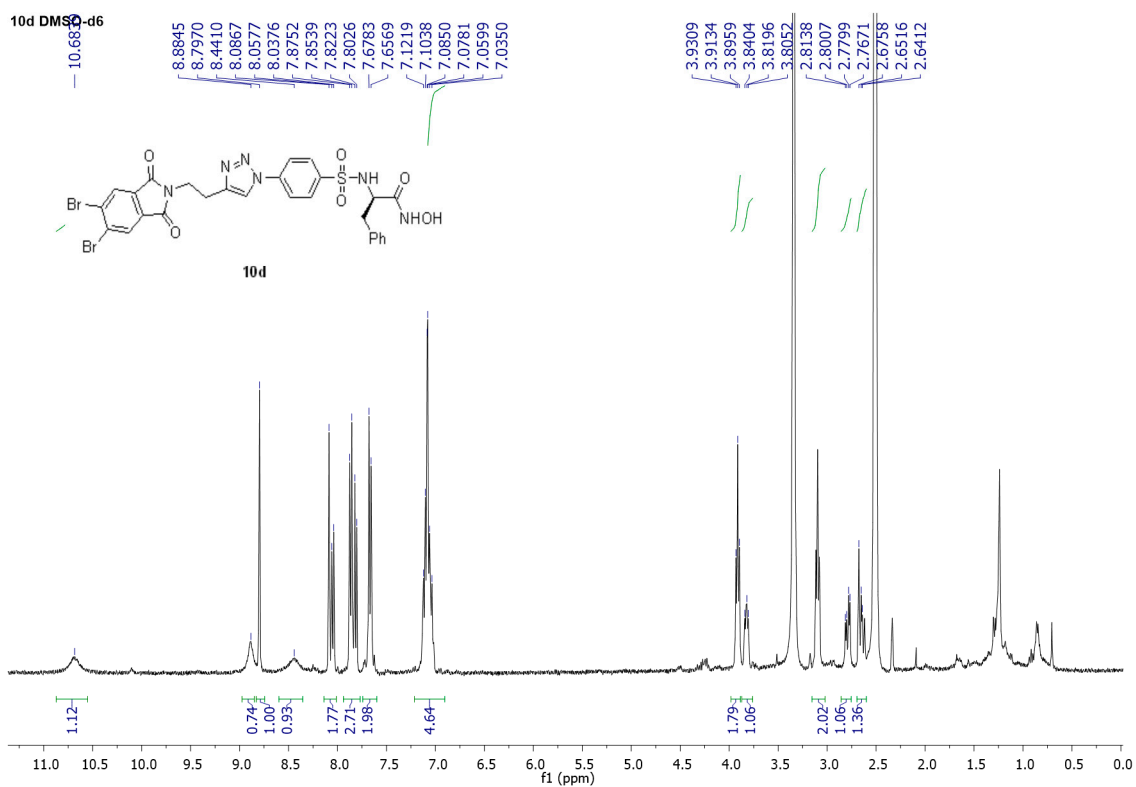

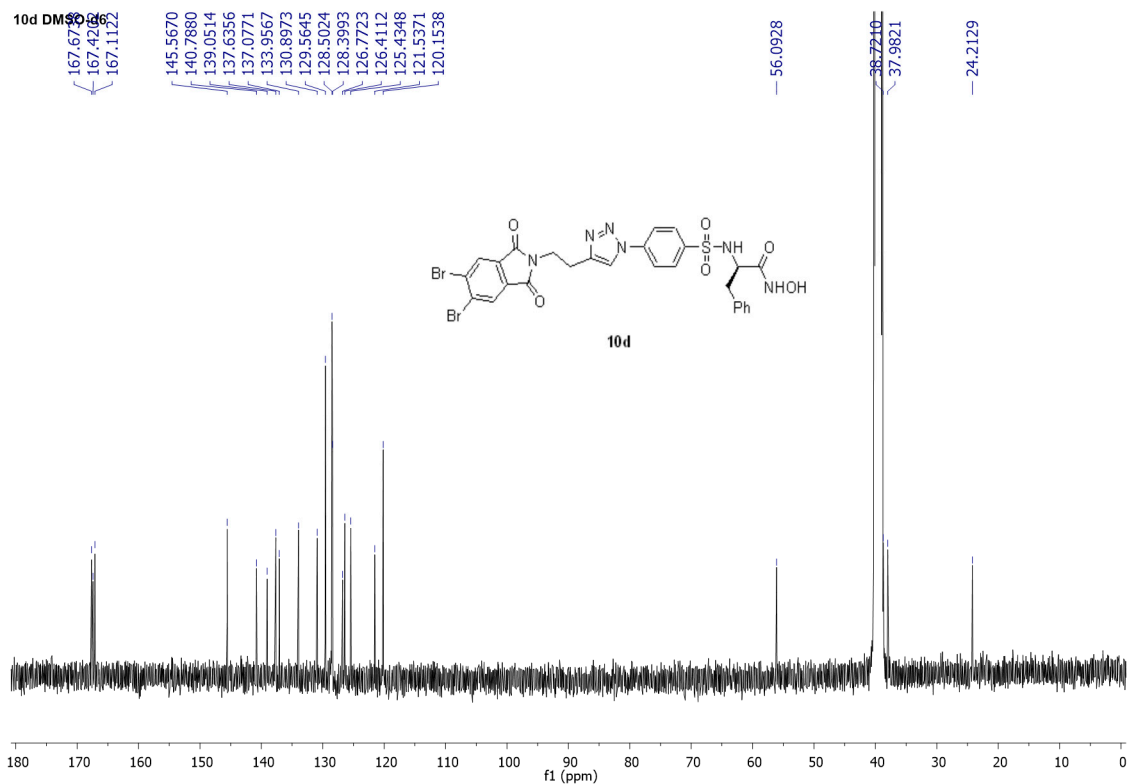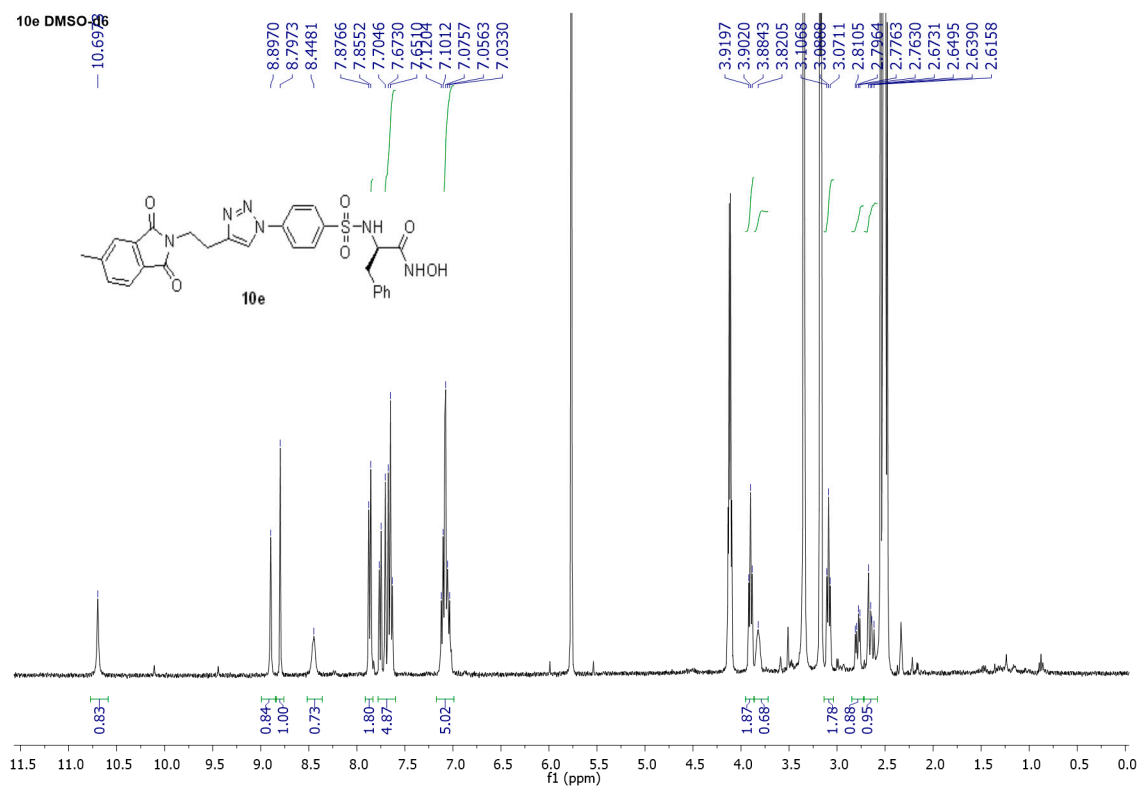

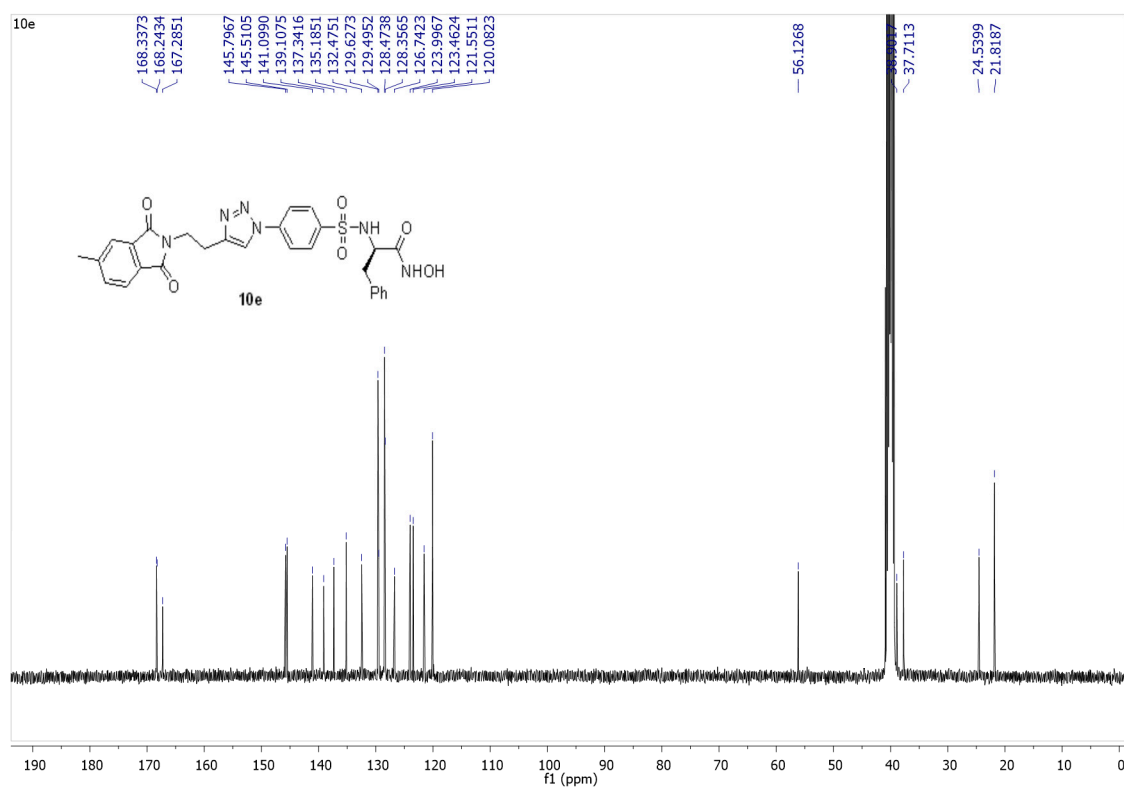

**Figure S2.**  $^1\text{H}$  and  $^{13}\text{C}$  NMR spectra for final compounds.



## PART C. Modeling

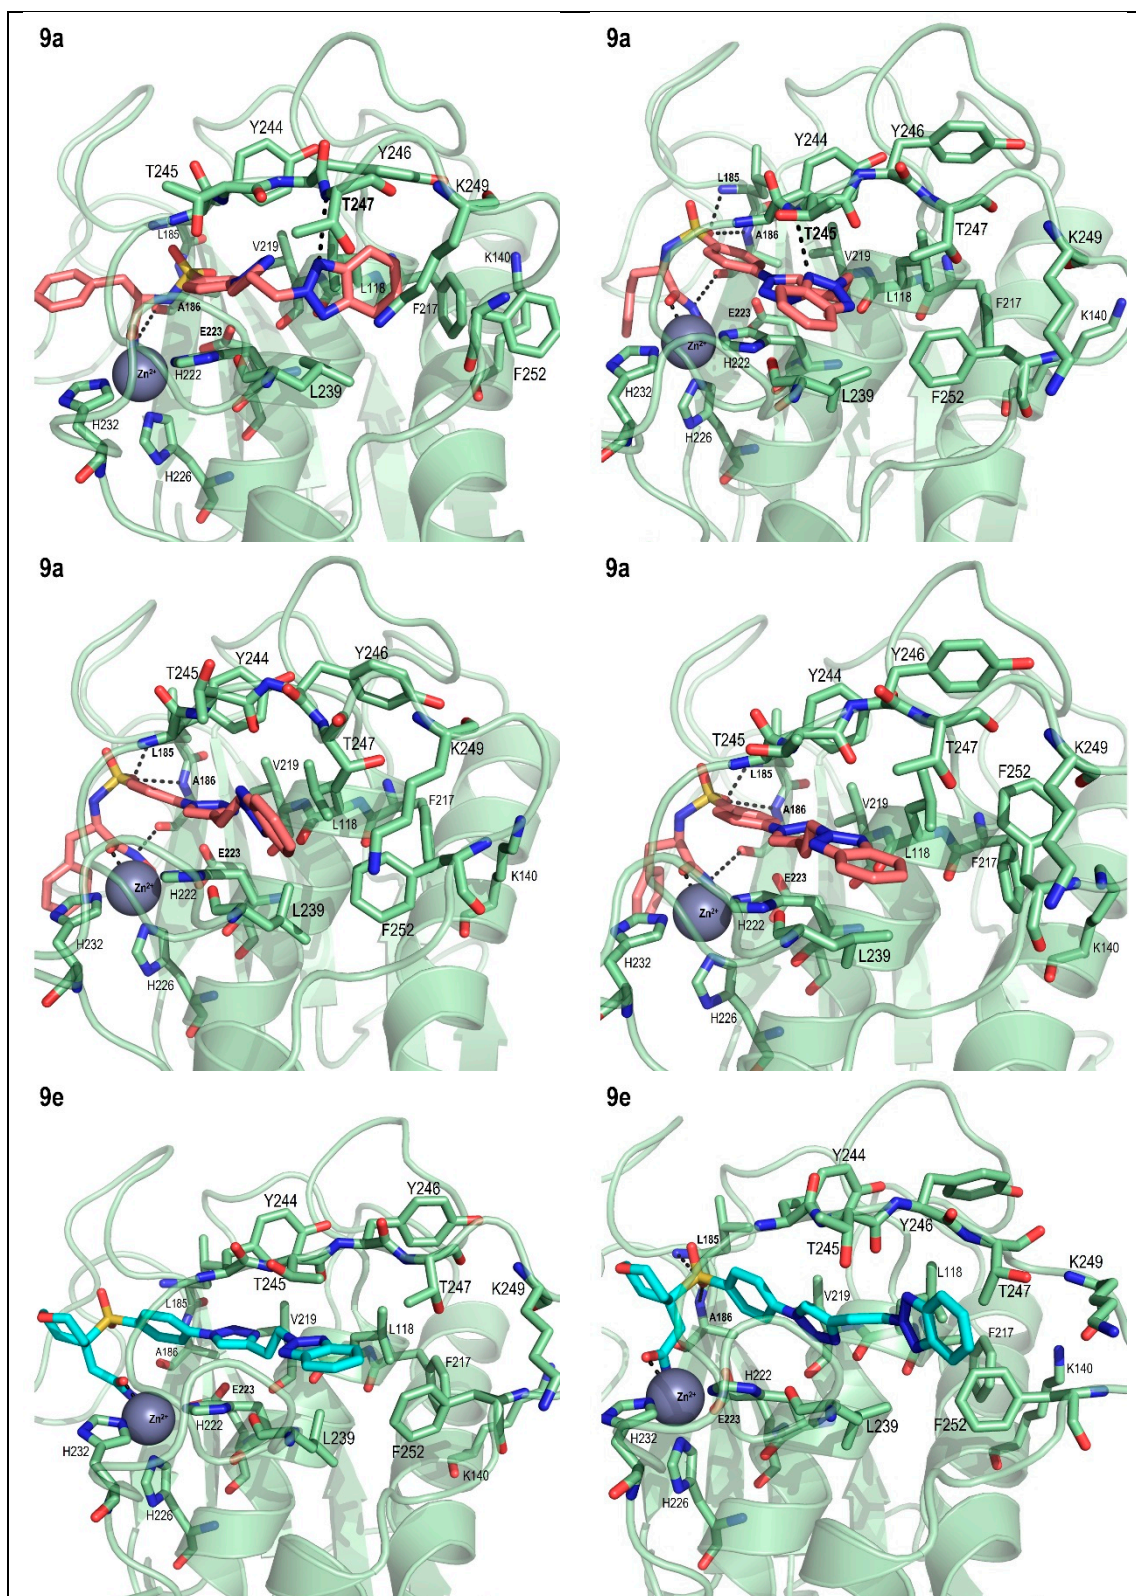

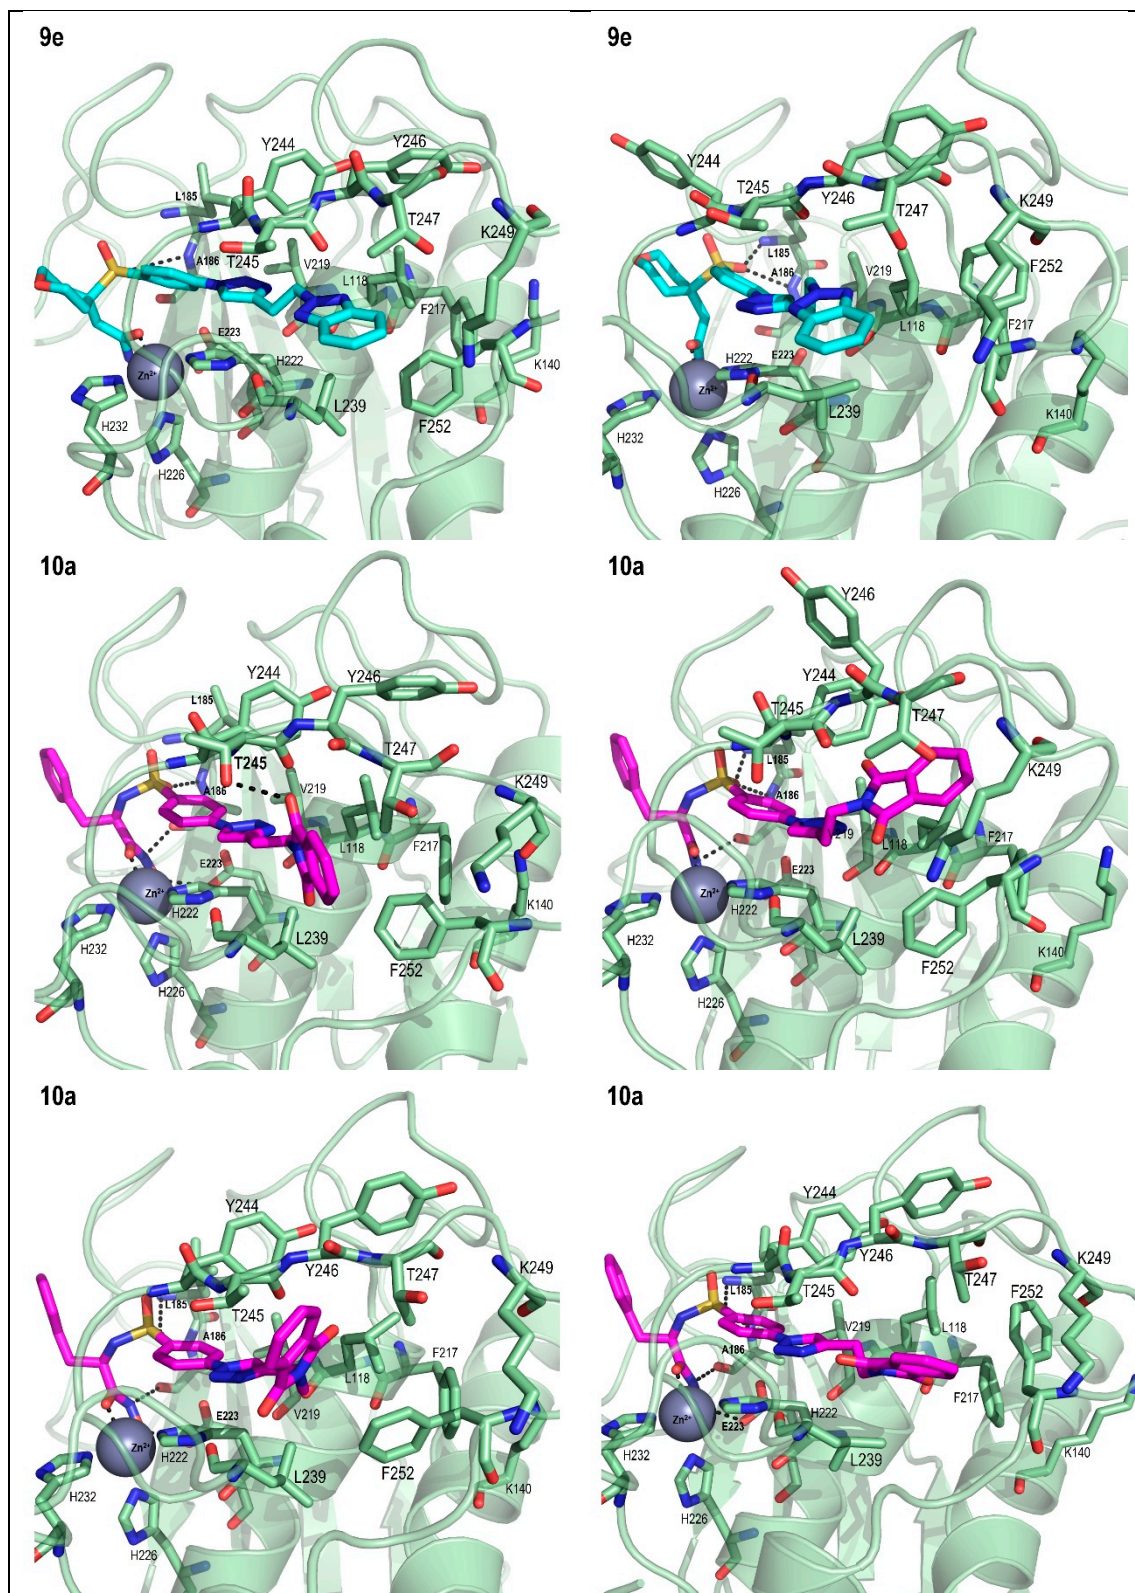



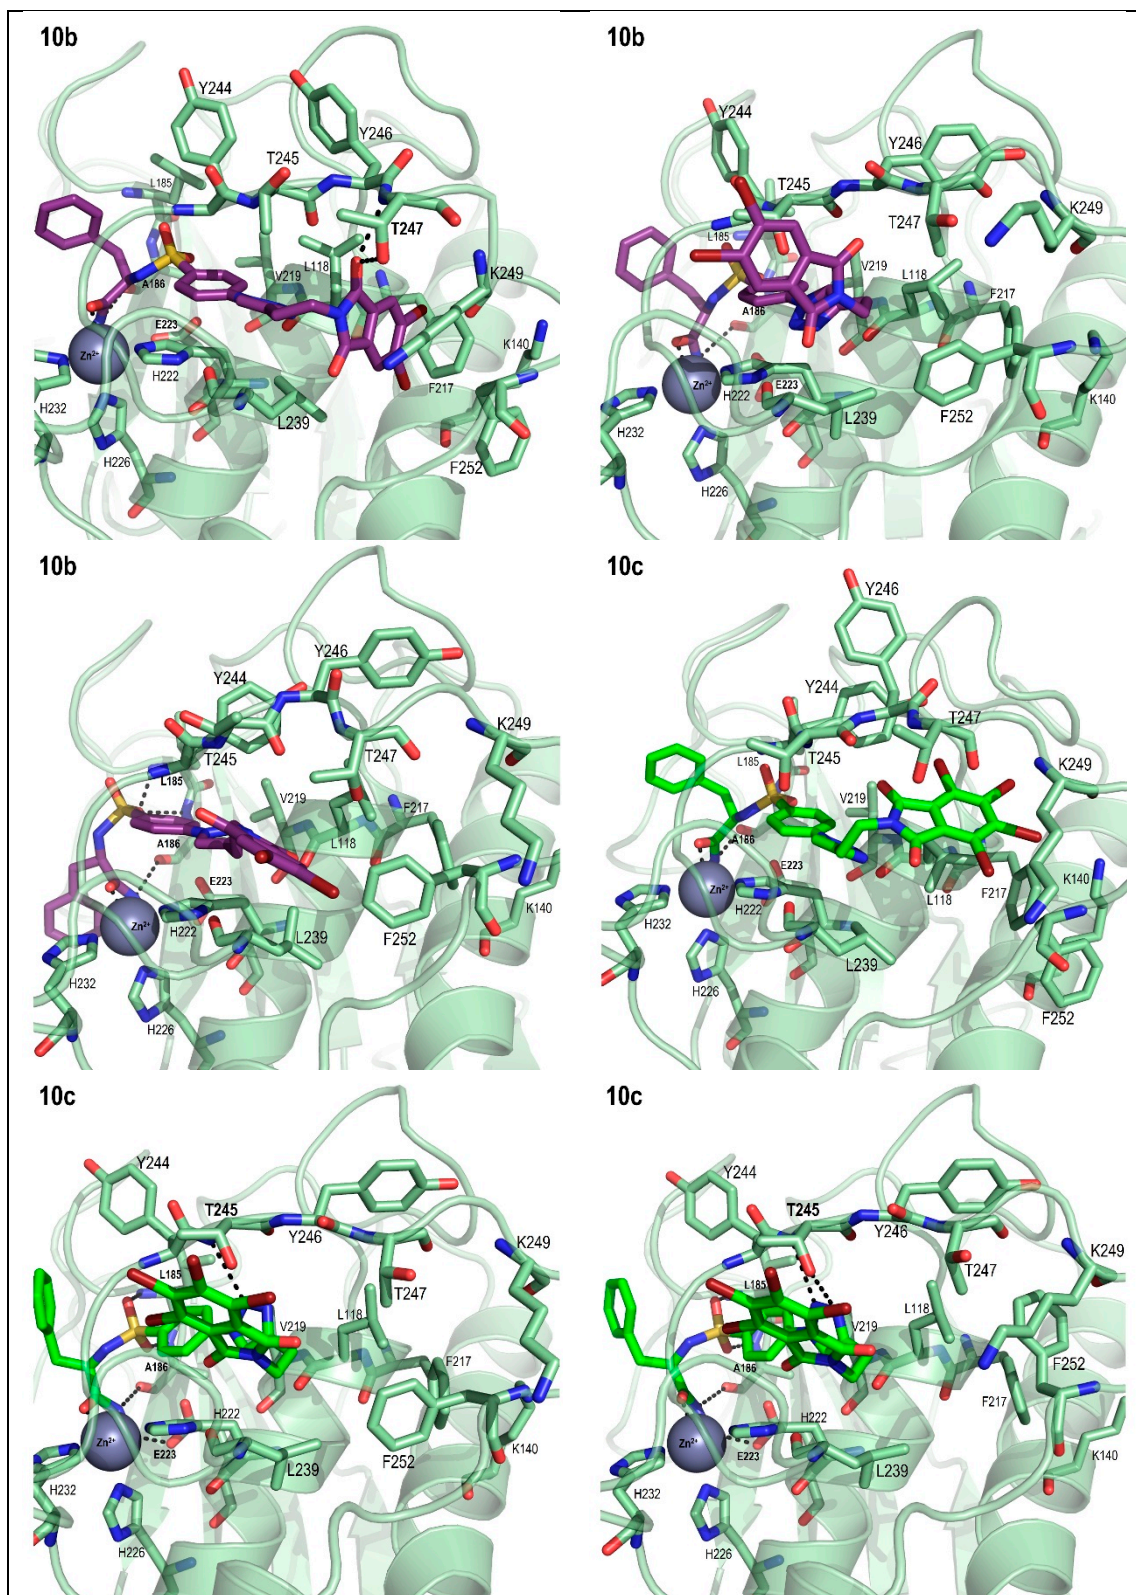



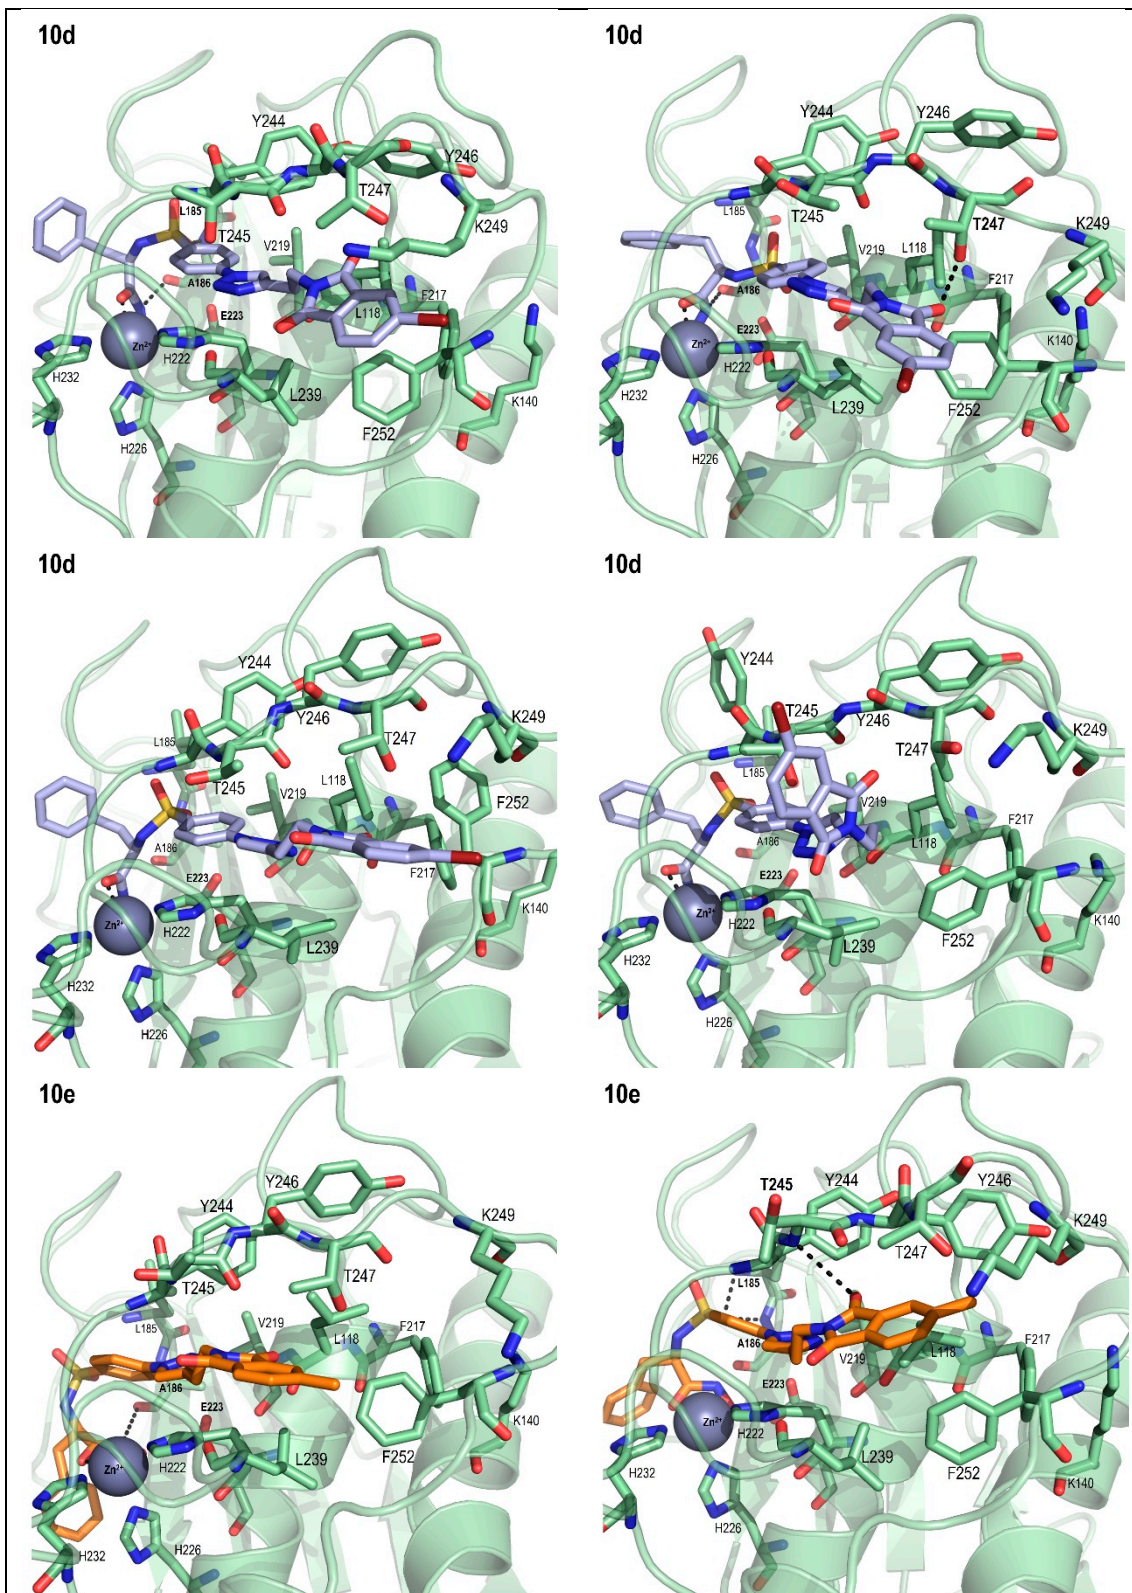



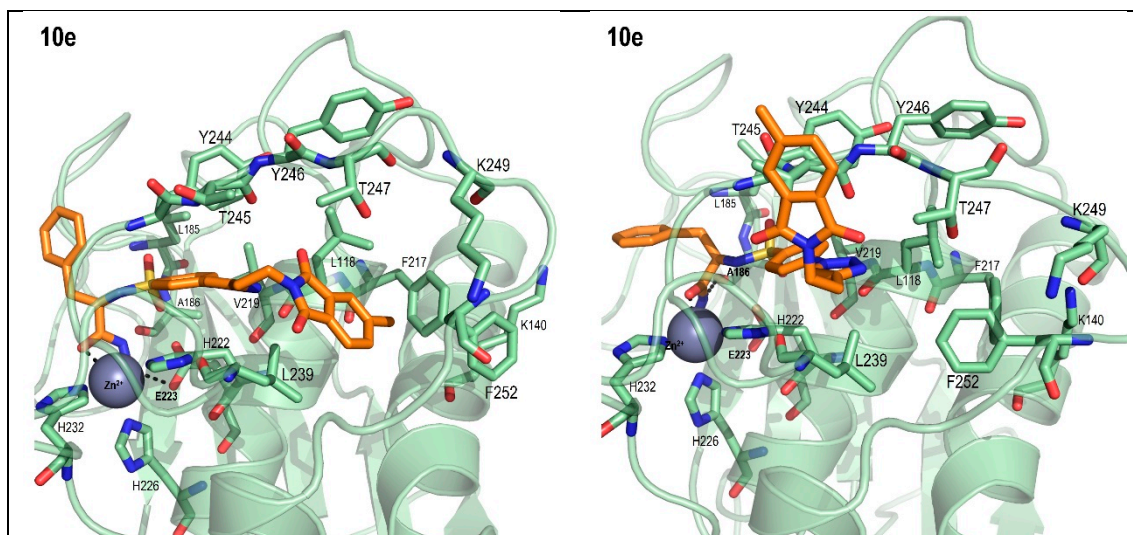

**Figure S3.** PyMOL stick and cartoon representation of the interactions established with the  $\Omega$ -loop and S1' obtained in the additional binding modes of the series of compounds when docked to the different crystal structures of MMP-13. Hydrogen bonds are shown in dashed lines, the catalytic zinc ion is shown as a grey sphere. For the sake of clarity, no hydrogens are shown.

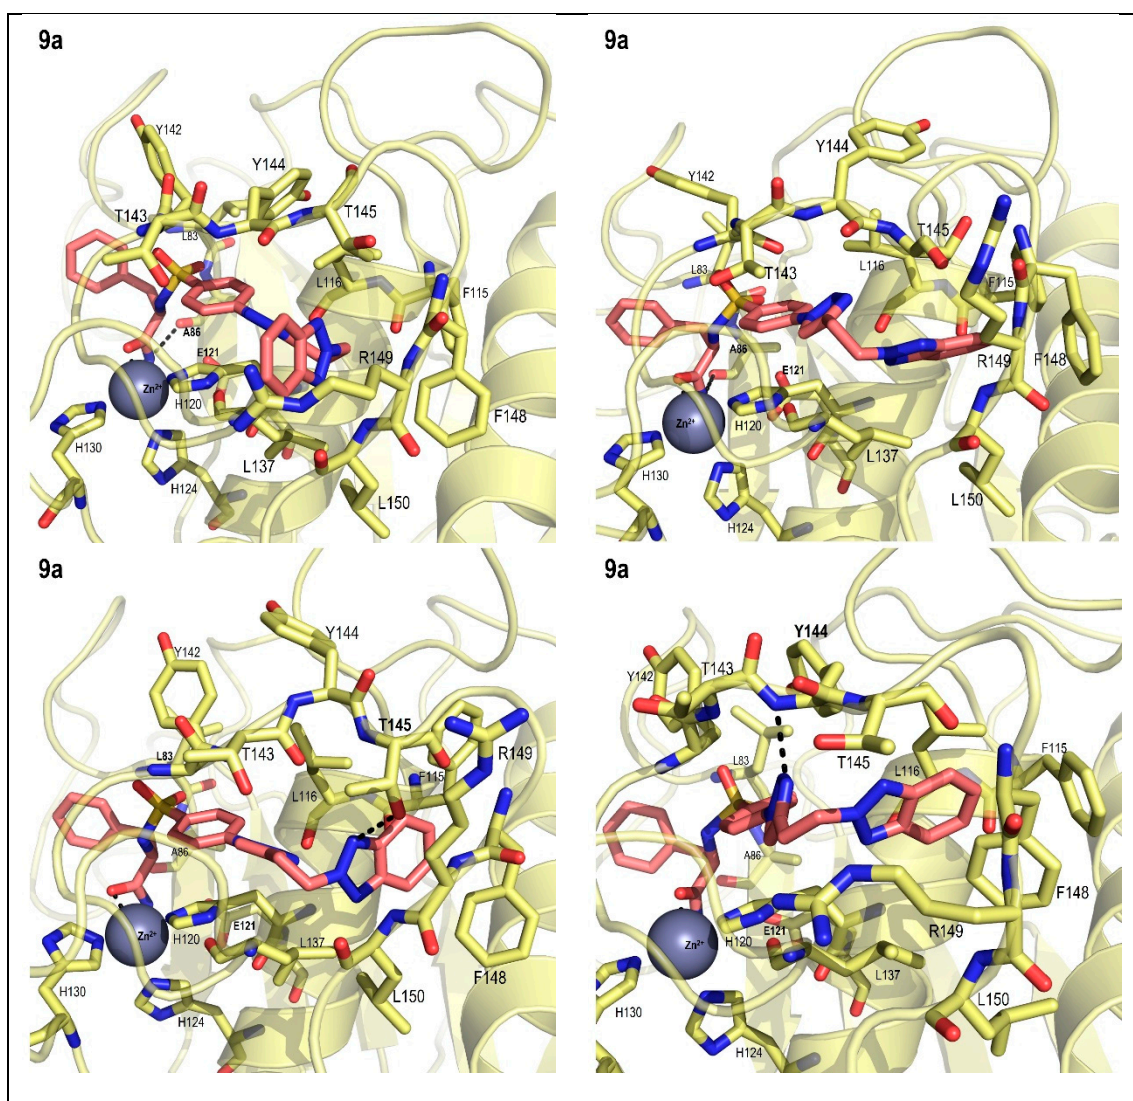



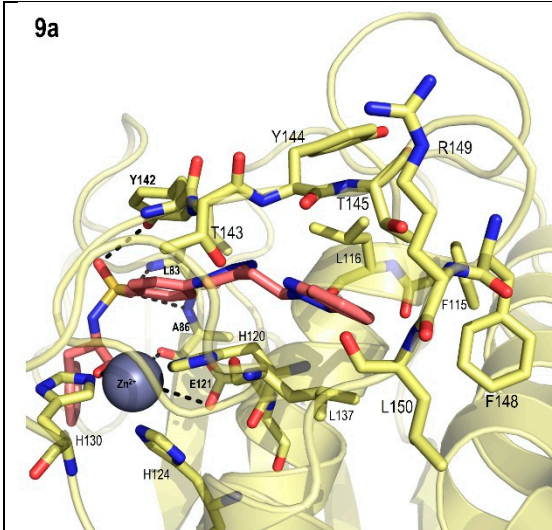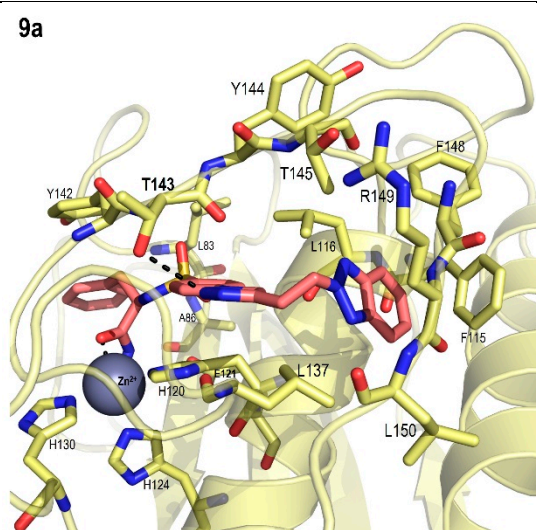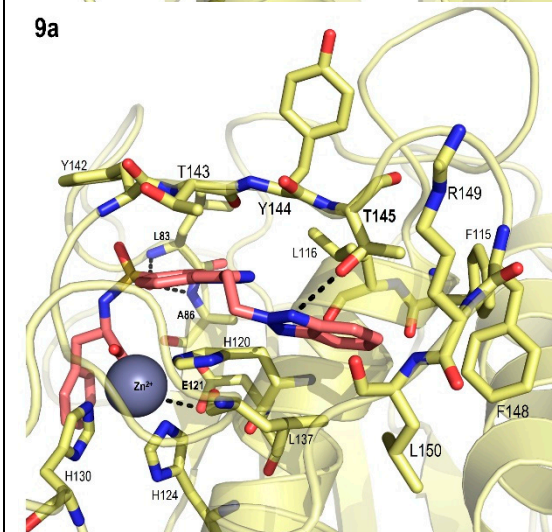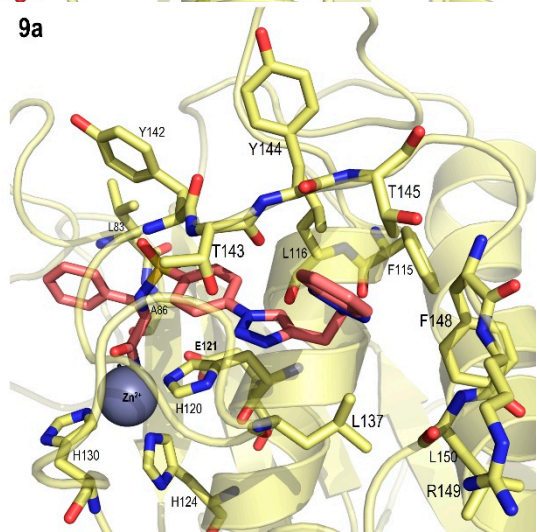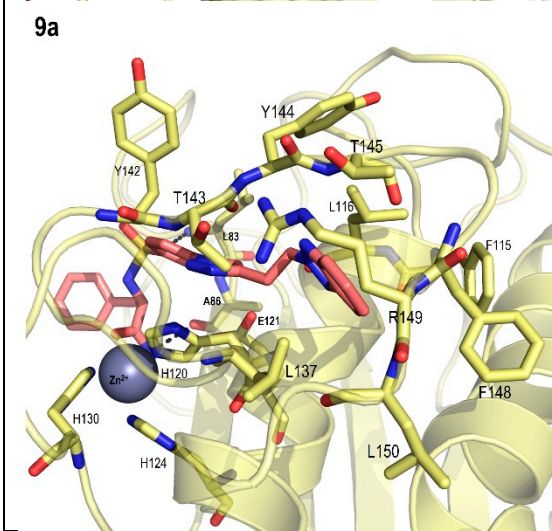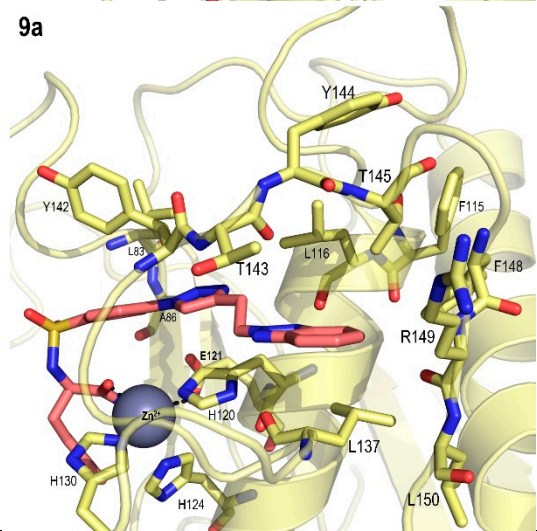



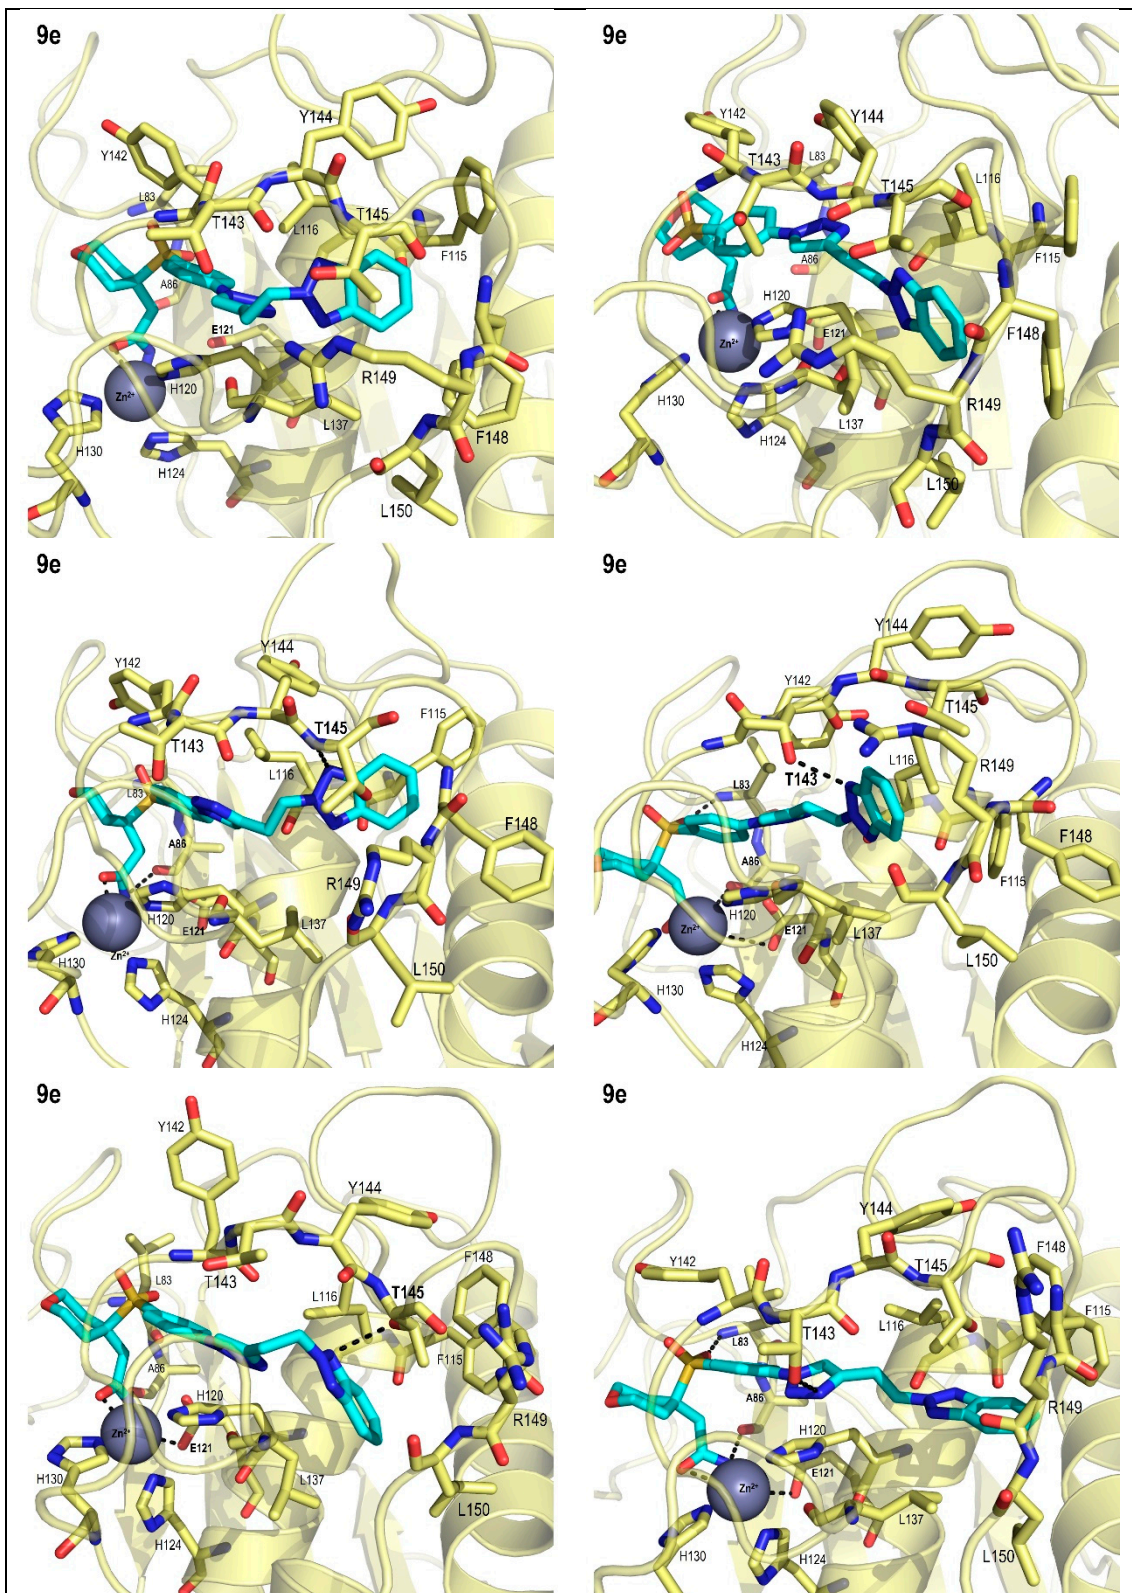



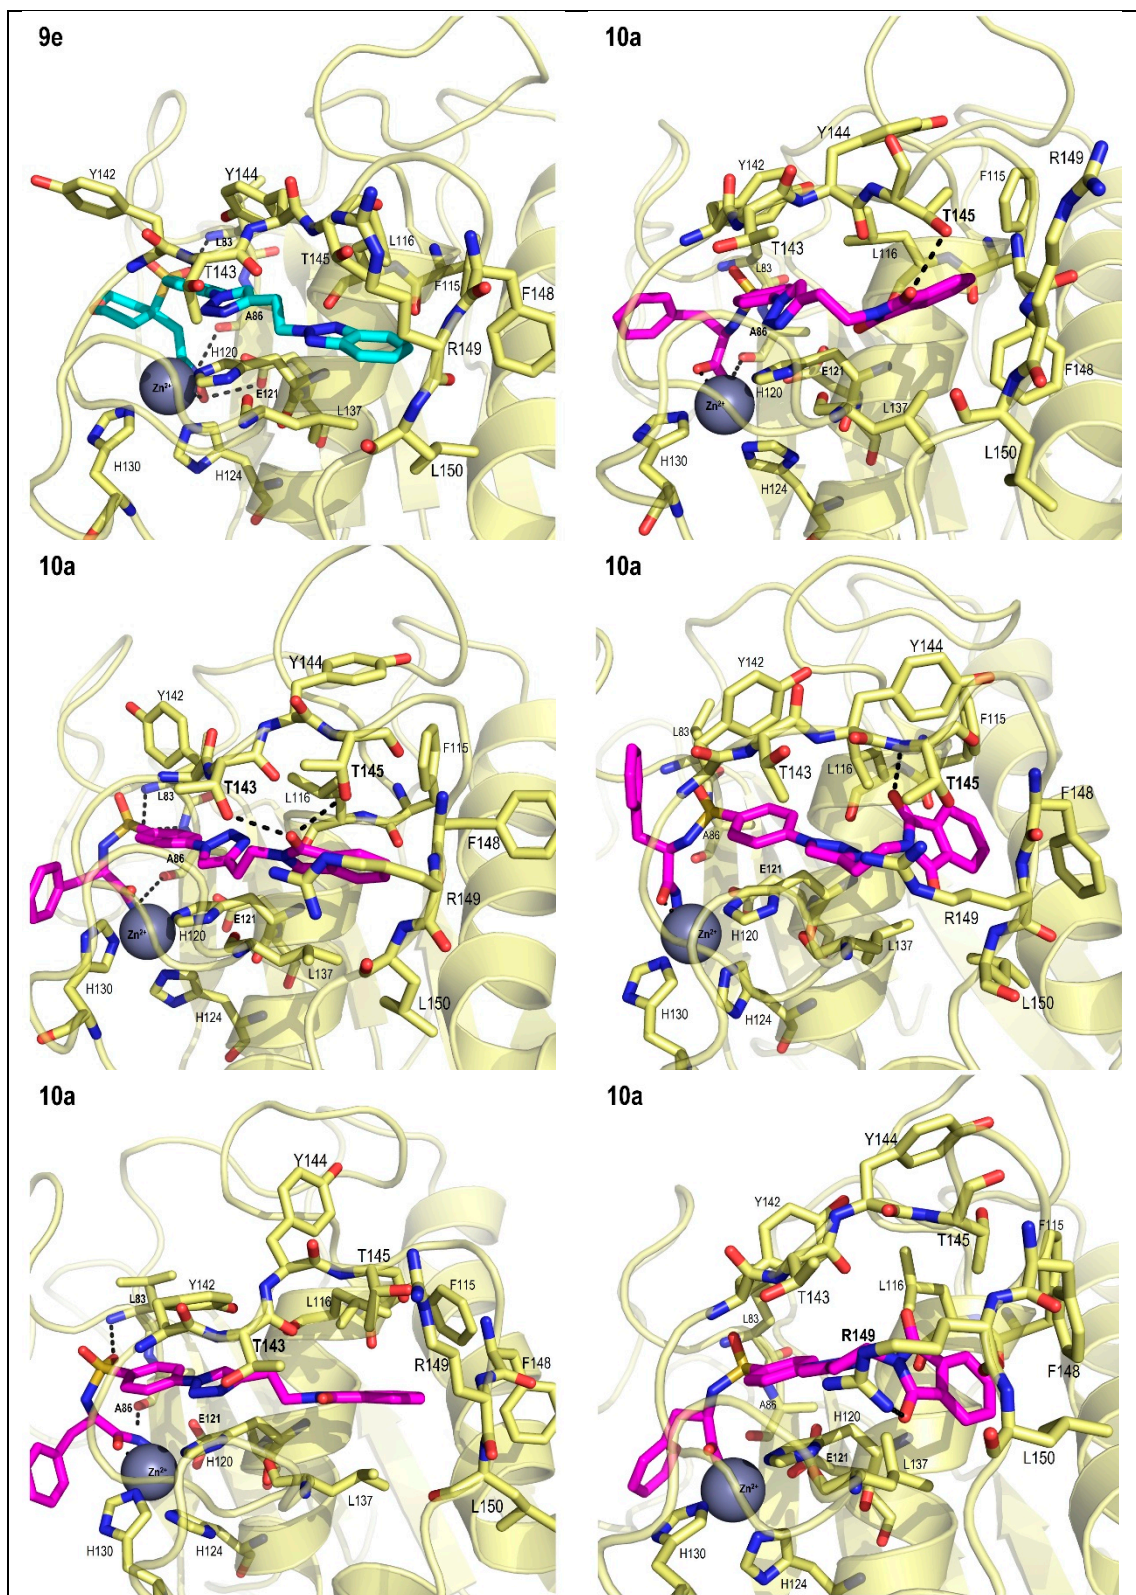



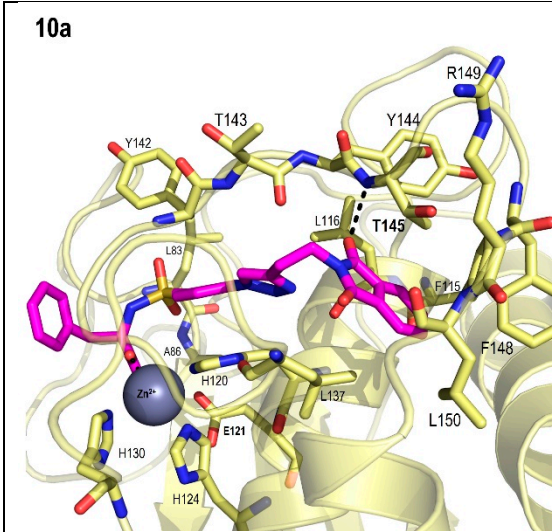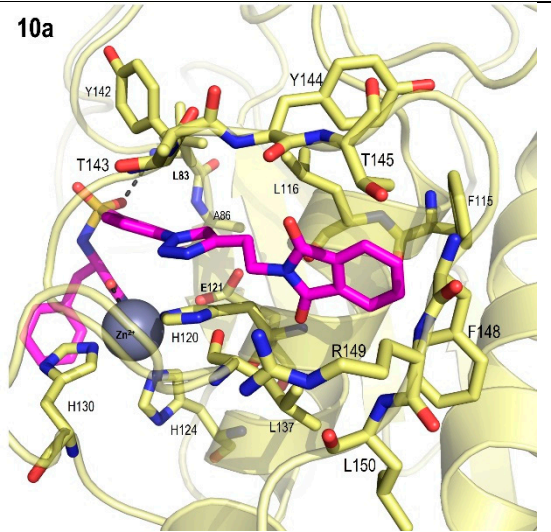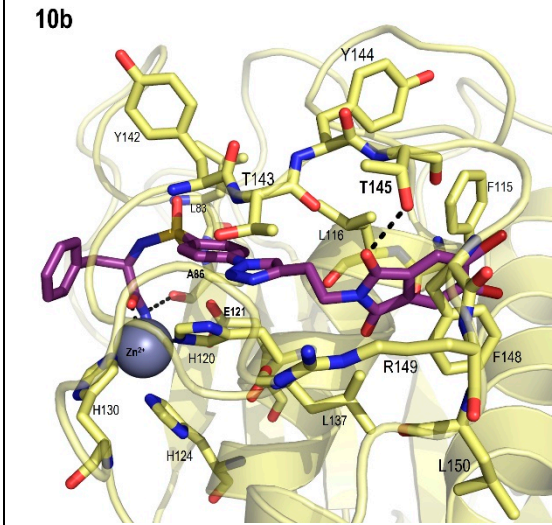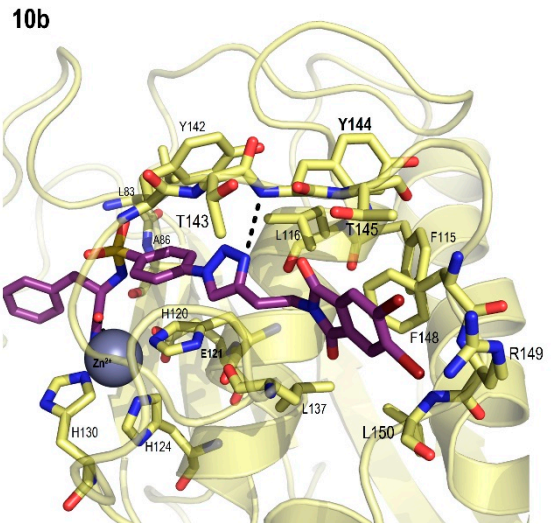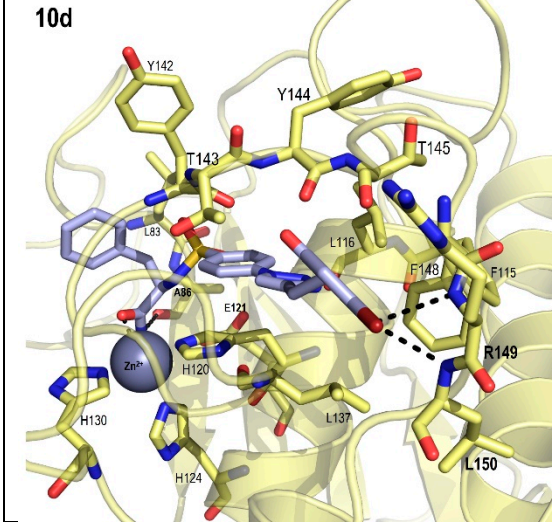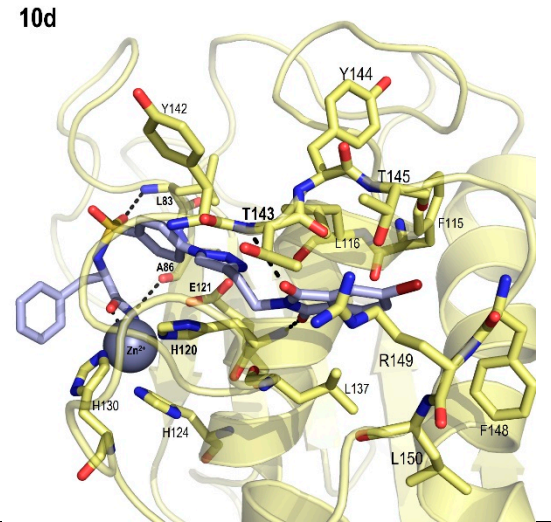



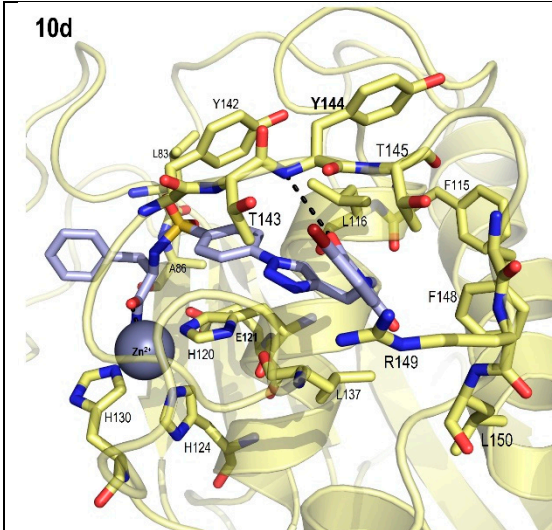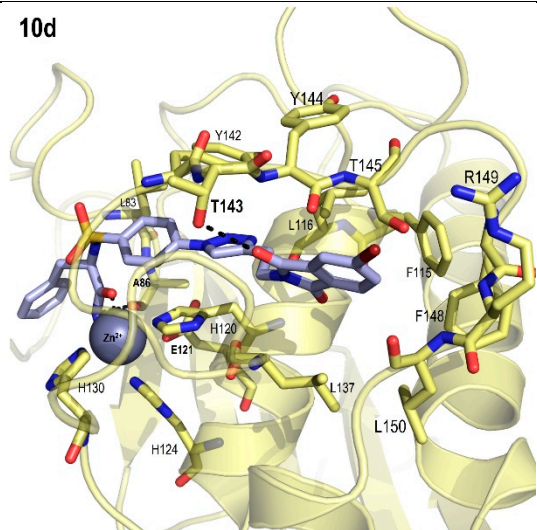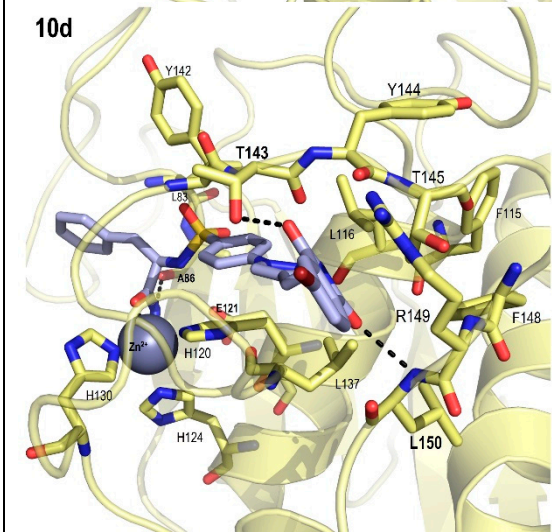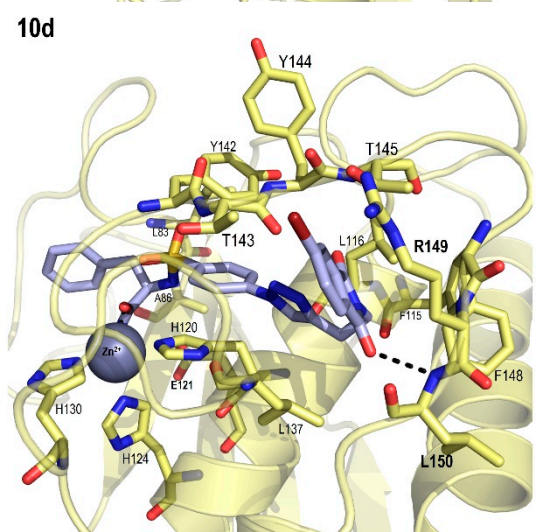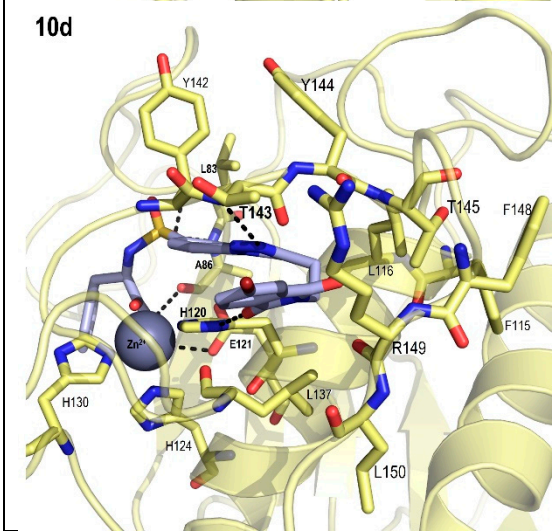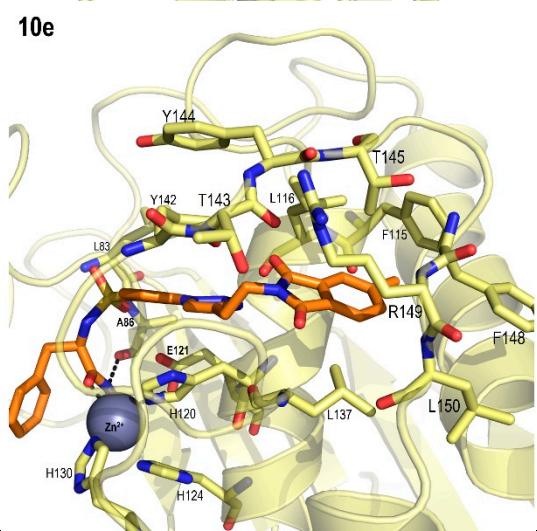

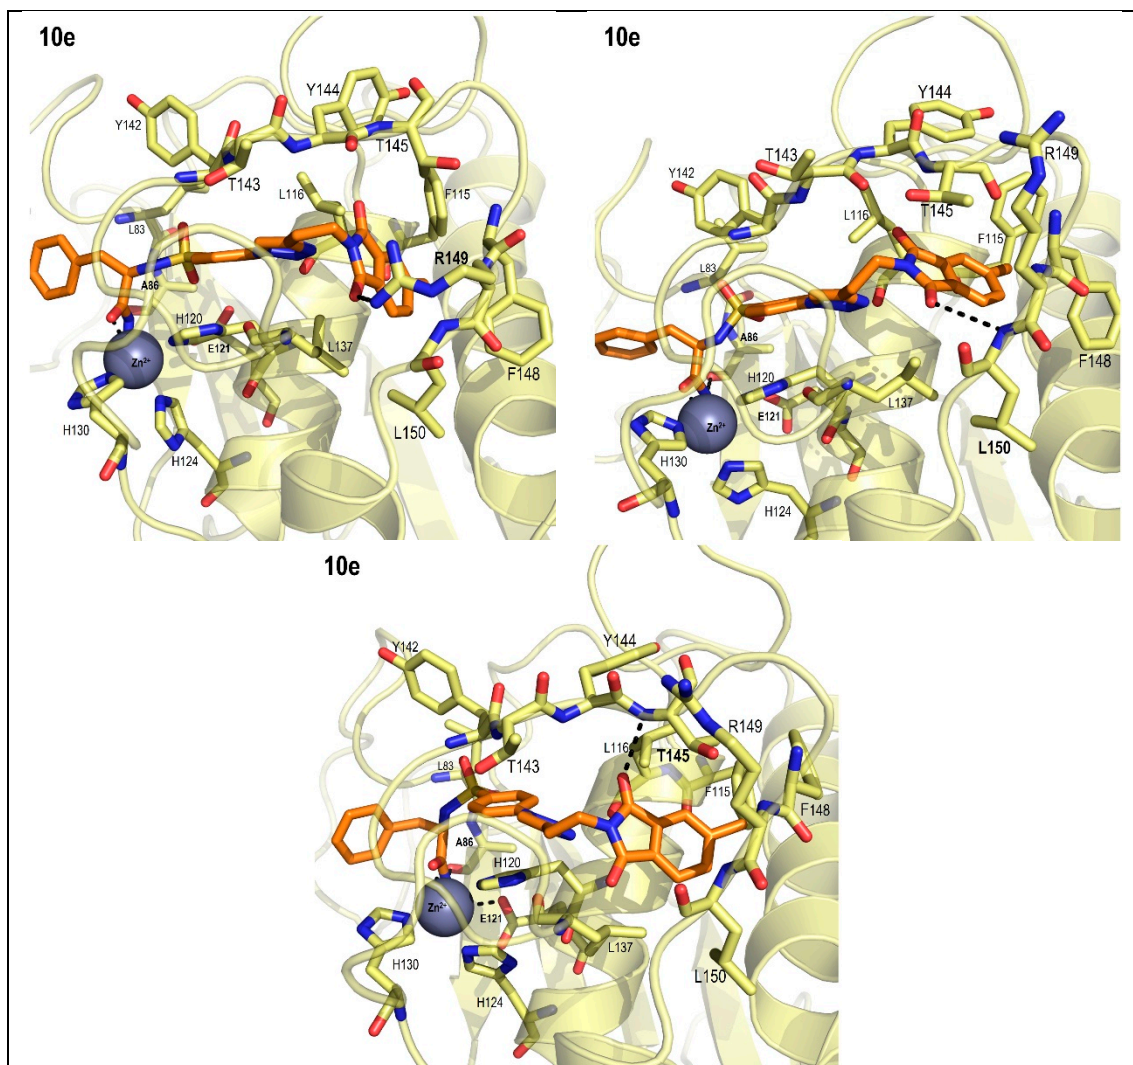

**Figure S4.** PyMOL stick and cartoon representation of the interactions established with the  $\Omega$ -loop and S1' pocket obtained in the additional binding modes of the series of compounds when docked to the different NMR models of MMP-2. Hydrogen bonds are shown in dashed lines, the catalytic zinc ion is shown as a grey sphere. For the sake of clarity, hydrogens are not shown.

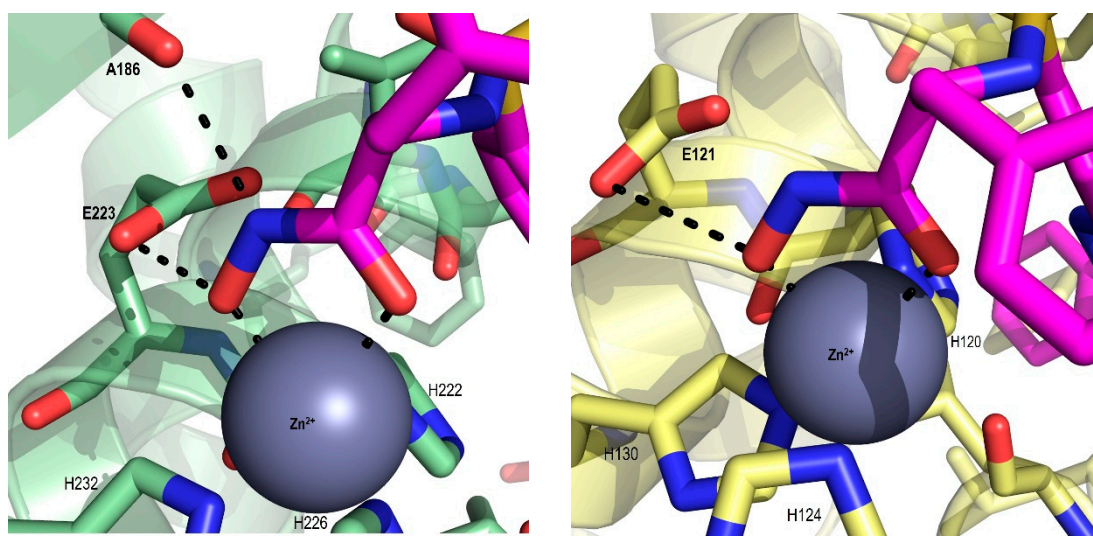



**Figure S5.** PyMOL stick and cartoon representation of the bidentate interaction established by the hydroxamate and the catalytic Zinc ion in both MMP-13 (left) and MMP-2 (right). Hydrogen bonds are shown in dashed lines, the catalytic zinc ion is shown as grey sphere. For the sake of clarity, no hydrogens are shown.

## PART D. NMR studies

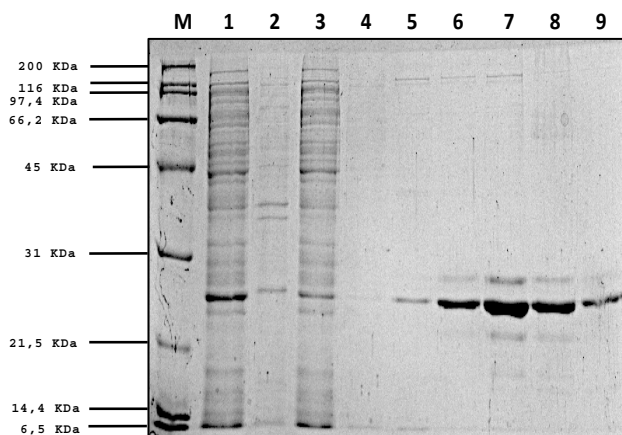

**Figure S6.** SDS-PAGE analysis of the recombinantly expressed catalytic domain of MMP-13 purified by metal affinity chromatography. M corresponds to the molecular weight markers (kDa). Lane 1: supernatant of total bacterial protein; lane 2: precipitate of total bacterial protein; lane 3: flow-through; lane 4: wash with purification buffer; lane 5: wash with purification buffer containing 10 mM imidazole; lane 6: wash with purification buffer containing 30 mM imidazole; lane 7: elution with purification buffer containing 250 mM imidazole; lane 8: elution with purification buffer containing 500 mM imidazole; lane 9: elution with purification buffer containing 1 M imidazole.

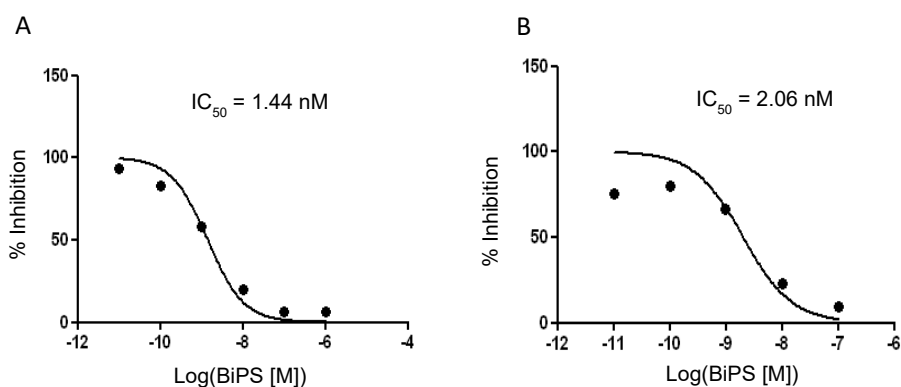

**Figure S7.** Dose response curve used to determine IC<sub>50</sub> of BiPS for A) recombinantly expressed catalytic domain of MMP-13, and B) commercially available MMP-13 active protein.

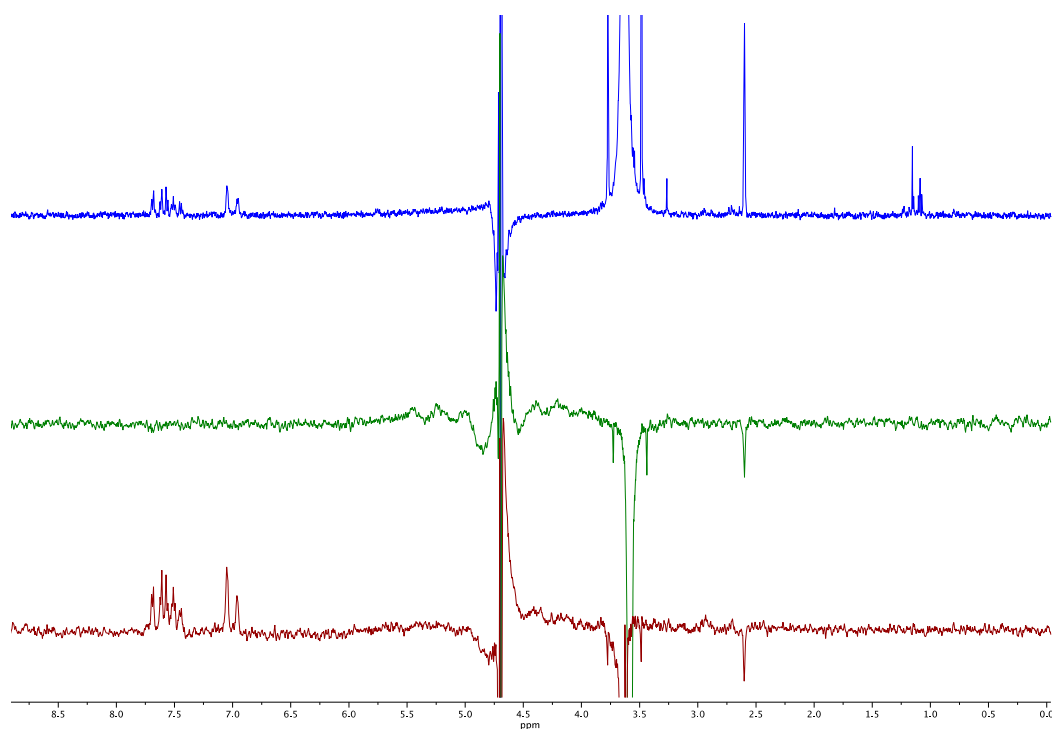

**Figure S8.** NMR studies for the interaction between the MMP-13 catalytic domain and BiPS. Blue: 1D  $^1\text{H}$  spectrum of BiPS and the MMP-13 catalytic domain; green: waterLOGSY experiment of BiPS; red: waterLOGSY experiment of BiPS in the presence of the MMP-13 catalytic domain.

## PART E. $\text{IC}_{50}$ calculations

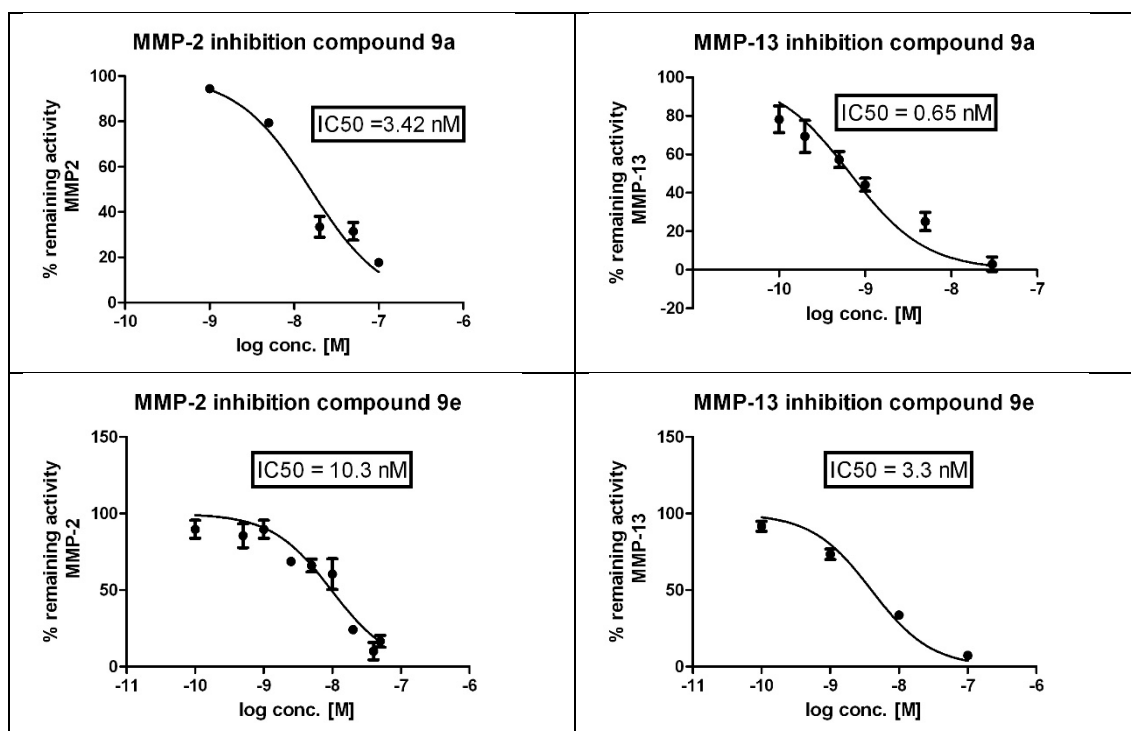

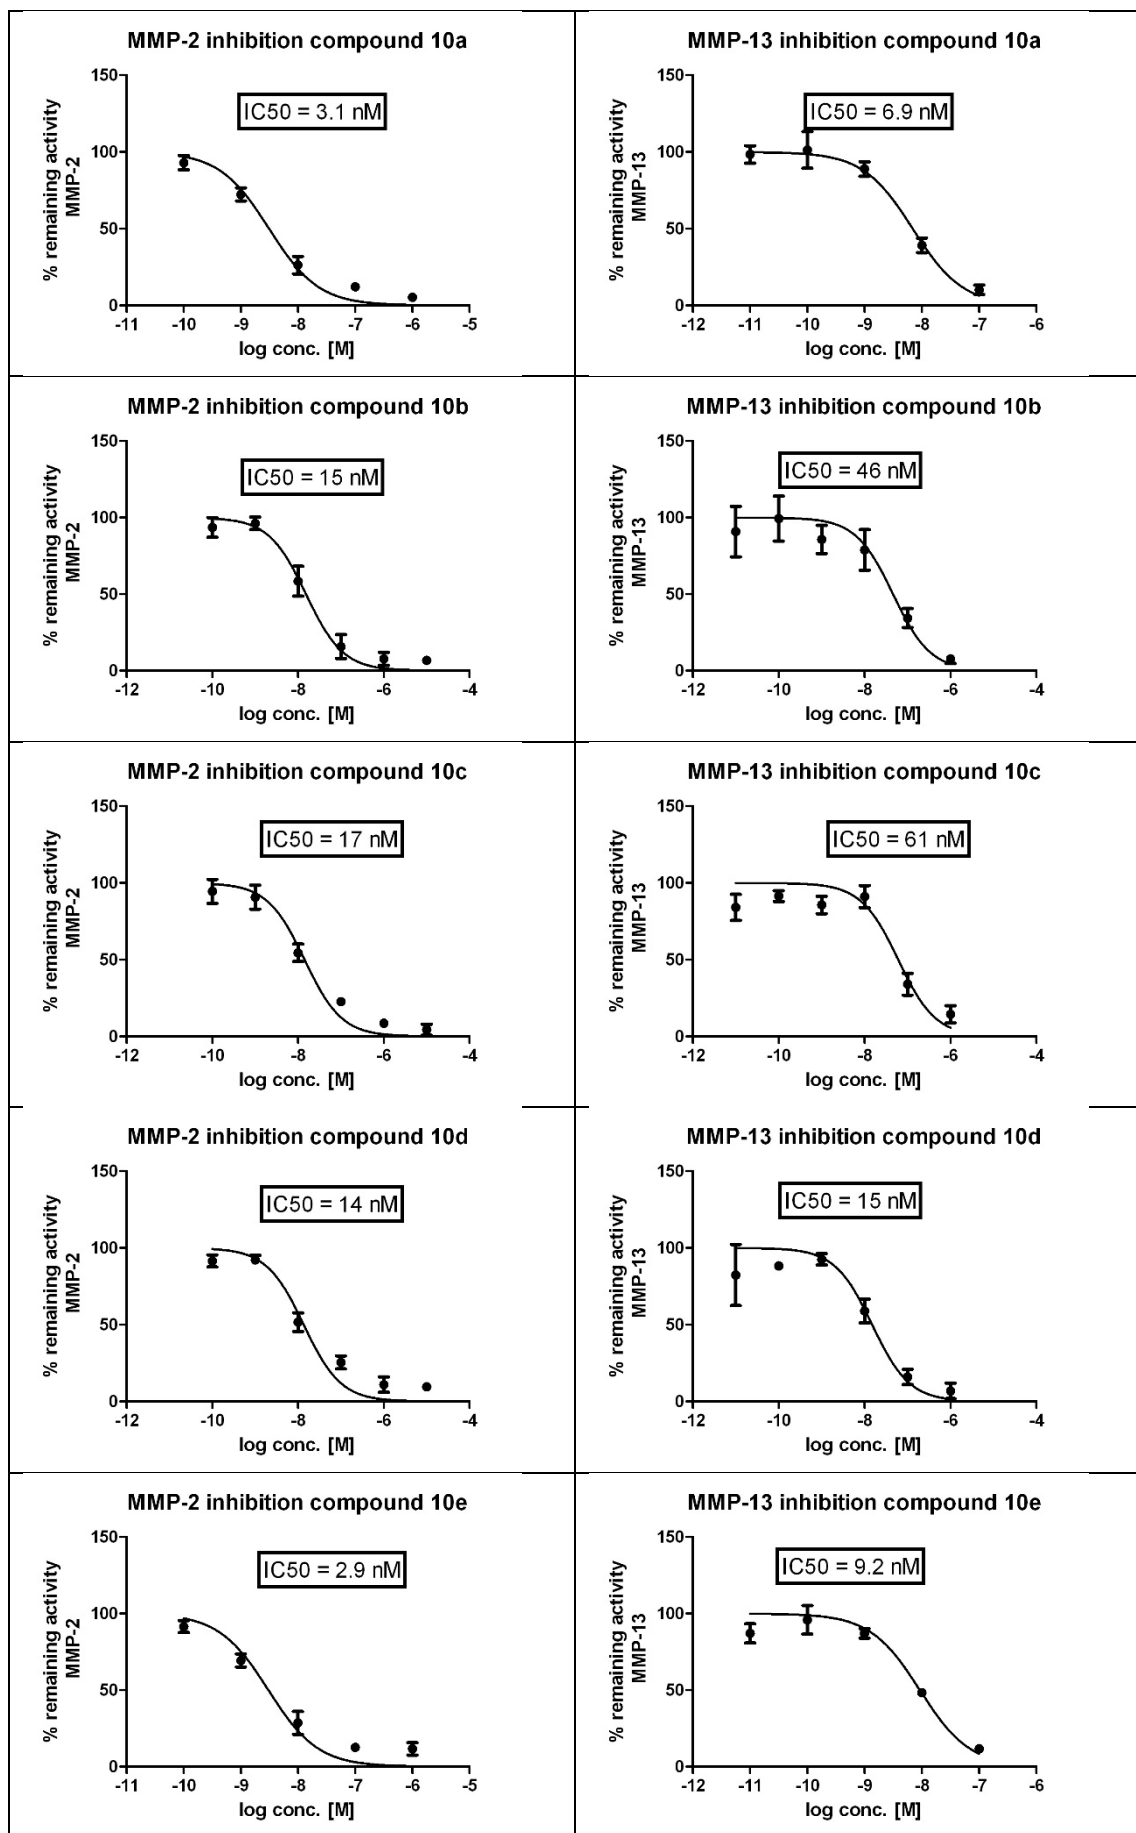

**Figure S9.** IC<sub>50</sub> calculations in MMP-13 and MMP-2 for active compounds.

## PART F. Purity by HPLC for the final compounds.

### HPLC for Compound 9a

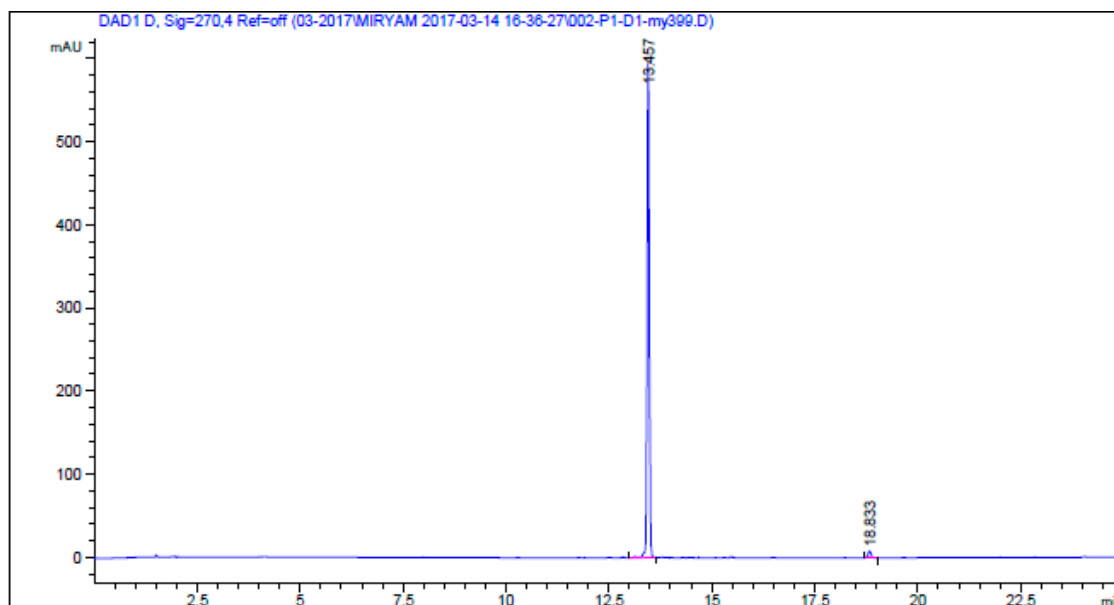

Signal 1: DAD1 D, Sig=270,4 Ref=off

| Peak # | RetTime [min] | Type | Width [min] | Area [mAU*s] | Height [mAU] | Area %  |
|--------|---------------|------|-------------|--------------|--------------|---------|
| 1      | 13.457        | VB R | 0.0583      | 2259.47827   | 595.23047    | 98.2746 |
| 2      | 18.833        | BB   | 0.0752      | 39.66923     | 8.38323      | 1.7254  |

Totals : 2299.14750 603.61370

### HPLC for Compound 9b

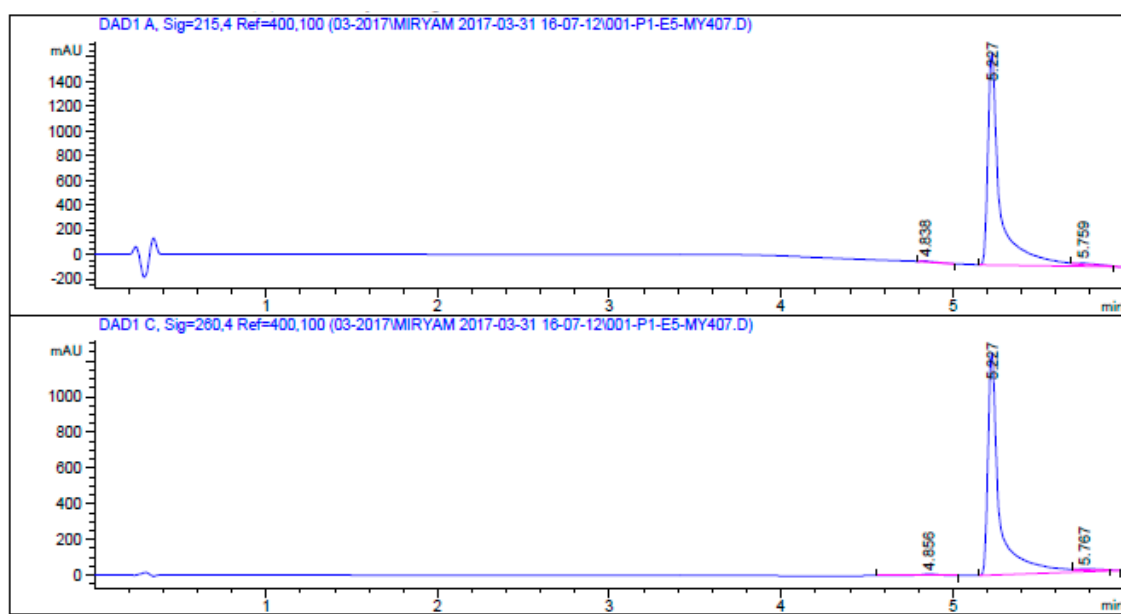

Signal 1: DAD1 A, Sig=215,4 Ref=400,100

| Peak # | RetTime [min] | Type | Width [min] | Area [mAU*s] | Height [mAU] | Area %  |
|--------|---------------|------|-------------|--------------|--------------|---------|
| 1      | 4.838         | BB   | 0.0878      | 36.47041     | 5.92225      | 0.4159  |
| 2      | 5.227         | BV R | 0.0707      | 8639.71191   | 1716.91211   | 98.5205 |

| Peak # | RetTime [min] | Type | Width [min] | Area [mAU*s] | Height [mAU] | Area % |
|--------|---------------|------|-------------|--------------|--------------|--------|
| 3      | 5.759         | VBAE | 0.1074      | 93.27305     | 11.65226     | 1.0636 |

Totals : 8769.45538 1734.48662

Signal 2: DAD1 C, Sig=260,4 Ref=400,100

| Peak # | RetTime [min] | Type | Width [min] | Area [mAU*s] | Height [mAU] | Area %  |
|--------|---------------|------|-------------|--------------|--------------|---------|
| 1      | 4.856         | BB   | 0.1171      | 74.85628     | 8.46912      | 1.2333  |
| 2      | 5.227         | BV R | 0.0675      | 5943.94629   | 1249.23083   | 97.9313 |
| 3      | 5.767         | VBAE | 0.1091      | 50.70398     | 6.35159      | 0.8354  |

Totals : 6069.50654 1264.05155

## HPLC for Compound 9c

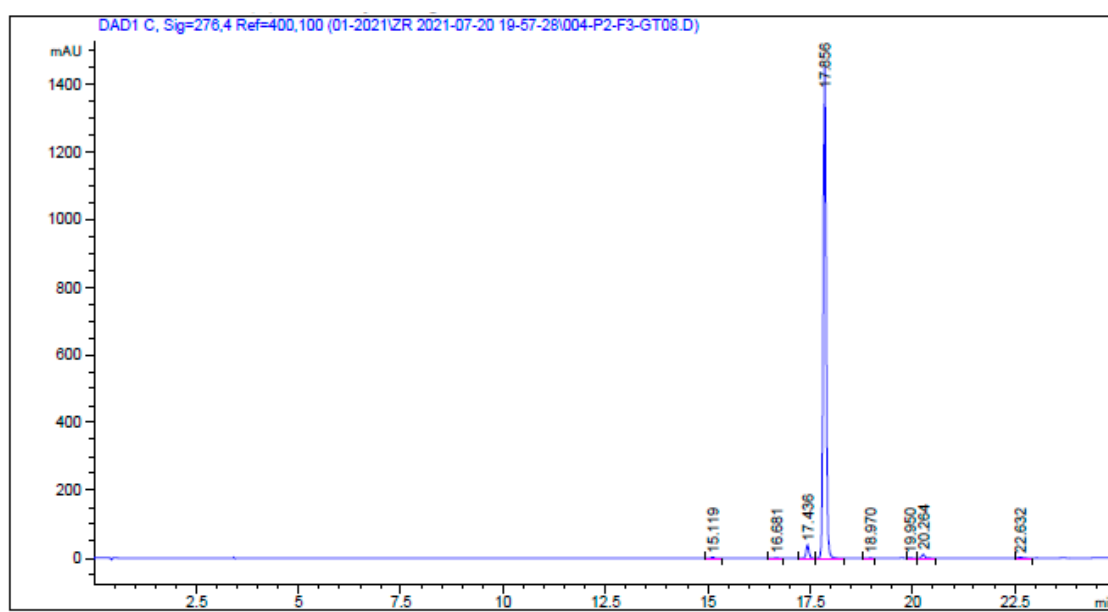



| Peak # | RetTime [min] | Type | Width [min] | Area [mAU*s] | Height [mAU] | Area %  |
|--------|---------------|------|-------------|--------------|--------------|---------|
| 1      | 15.119        | BB   | 0.0775      | 16.11996     | 3.16158      | 0.2147  |
| 2      | 16.681        | BB   | 0.0930      | 12.50229     | 1.99875      | 0.1665  |
| 3      | 17.436        | BB   | 0.0756      | 196.85049    | 39.85465     | 2.6220  |
| 4      | 17.856        | BB   | 0.0757      | 7194.41211   | 1454.10107   | 95.8280 |
| 5      | 18.970        | BV   | 0.0806      | 6.86097      | 1.27891      | 0.0914  |
| 6      | 19.950        | BB   | 0.0798      | 6.80947      | 1.32931      | 0.0907  |
| 7      | 20.264        | BV R | 0.0800      | 56.38695     | 10.60598     | 0.7511  |
| 8      | 22.632        | BB   | 0.0943      | 17.68854     | 2.85532      | 0.2356  |

Totals : 7507.63078 1515.18557

### HPLC for Compound 9d

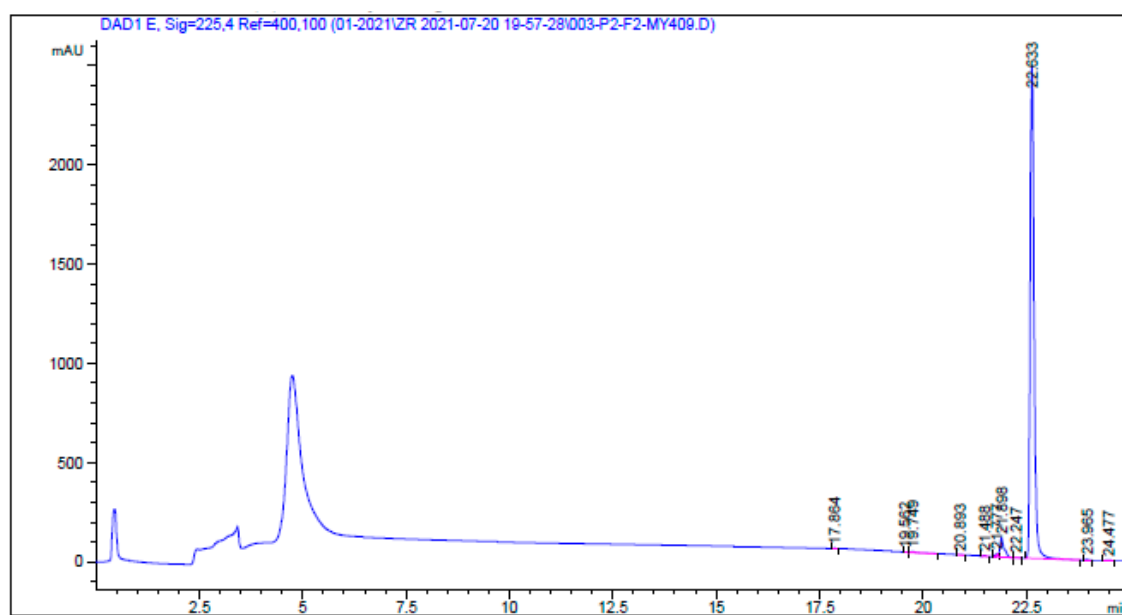

(Blank with DMSO)

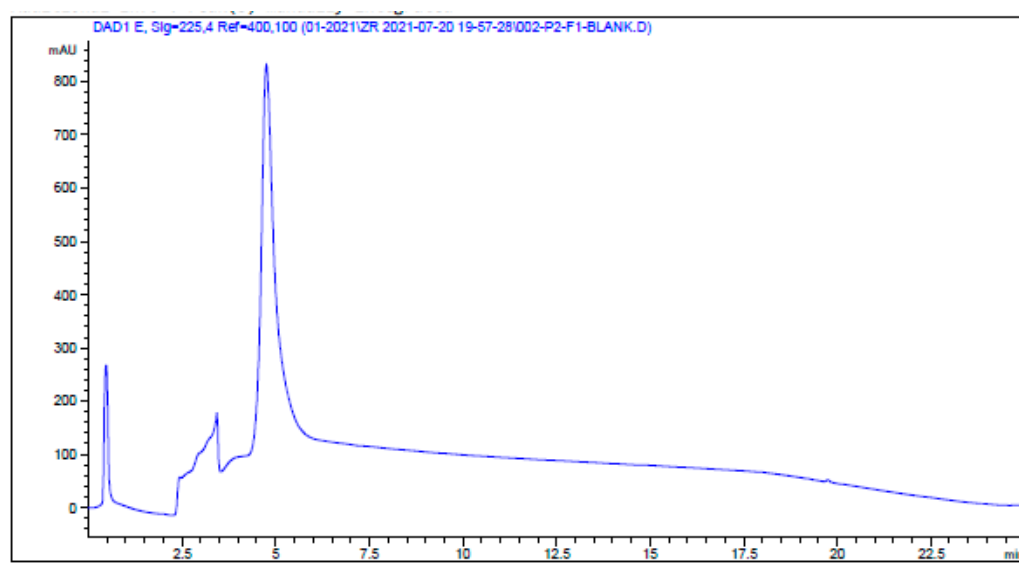

| Peak # | RetTime [min] | Type | Width [min] | Area [mAU*s] | Height [mAU] | Area %  |
|--------|---------------|------|-------------|--------------|--------------|---------|
| 1      | 17.864        | BV   | 0.0895      | 8.26097      | 1.34708      | 0.0477  |
| 2      | 19.562        | VV   | 0.0946      | 11.94984     | 1.81893      | 0.0690  |
| 3      | 19.749        | VB   | 0.1401      | 47.16131     | 4.65719      | 0.2722  |
| 4      | 20.893        | BB   | 0.0779      | 6.38866      | 1.28624      | 0.0369  |
| 5      | 21.488        | BB   | 0.0820      | 10.55691     | 1.98744      | 0.0609  |
| 6      | 21.777        | BV E | 0.0660      | 48.15607     | 11.23072     | 0.2780  |
| 7      | 21.898        | VB R | 0.1009      | 682.95239    | 96.13583     | 3.9425  |
| 8      | 22.247        | BB   | 0.0951      | 7.37572      | 1.14606      | 0.0426  |
| 9      | 22.633        | BB   | 0.1033      | 1.64512e4    | 2482.61694   | 94.9675 |
| 10     | 23.965        | BB   | 0.0835      | 20.65994     | 3.79639      | 0.1193  |
| 11     | 24.477        | BB   | 0.1354      | 28.32399     | 3.46351      | 0.1635  |

Totals : 1.73230e4 2609.48632

### HPLC for Compound 9e

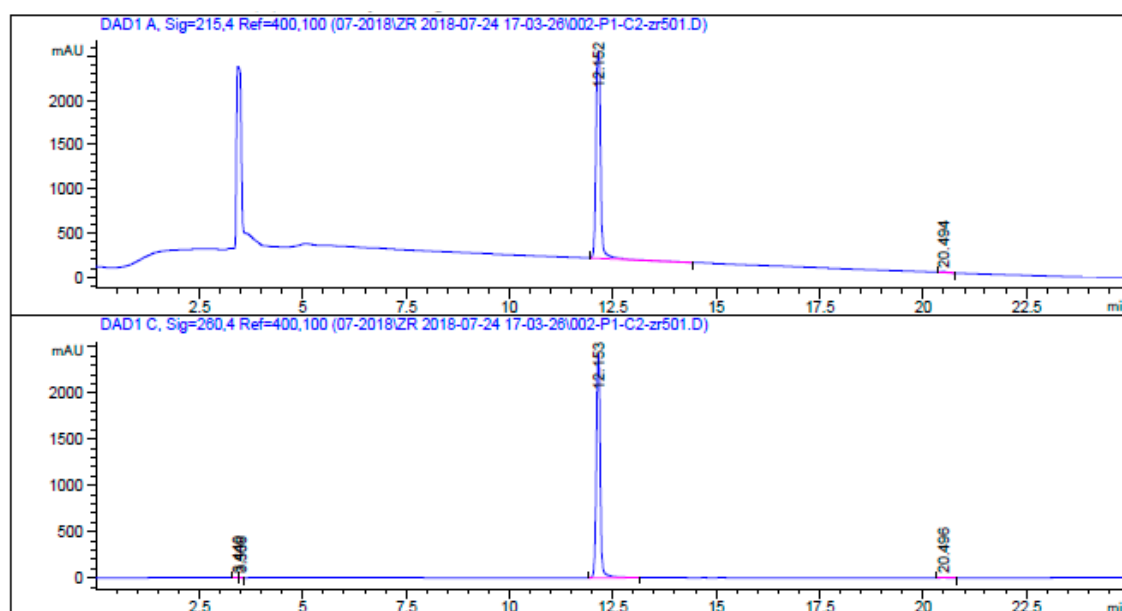

| Peak # | RetTime [min] | Type | Width [min] | Area [mAU*s] | Height [mAU] | Area %  |
|--------|---------------|------|-------------|--------------|--------------|---------|
| 1      | 12.152        | BB   | 0.1277      | 1.87126e4    | 2329.23779   | 99.6838 |
| 2      | 20.494        | BB   | 0.0871      | 59.35725     | 10.31442     | 0.3162  |

Totals : 1.87719e4 2339.55221

Signal 2: DAD1 C, Sig=260,4 Ref=400,100

| Peak # | RetTime [min] | Type | Width [min] | Area [mAU*s] | Height [mAU] | Area %  |
|--------|---------------|------|-------------|--------------|--------------|---------|
| 1      | 3.440         | BV   | 0.0616      | 6.71400      | 1.57931      | 0.0415  |
| 2      | 3.508         | VB   | 0.0700      | 7.67466      | 1.78961      | 0.0475  |
| 3      | 12.153        | BB   | 0.1034      | 1.61354e4    | 2430.89648   | 99.7939 |
| 4      | 20.496        | BB   | 0.0902      | 18.93077     | 3.14770      | 0.1171  |

Totals : 1.61687e4 2437.41310

### HPLC for Compound 10a

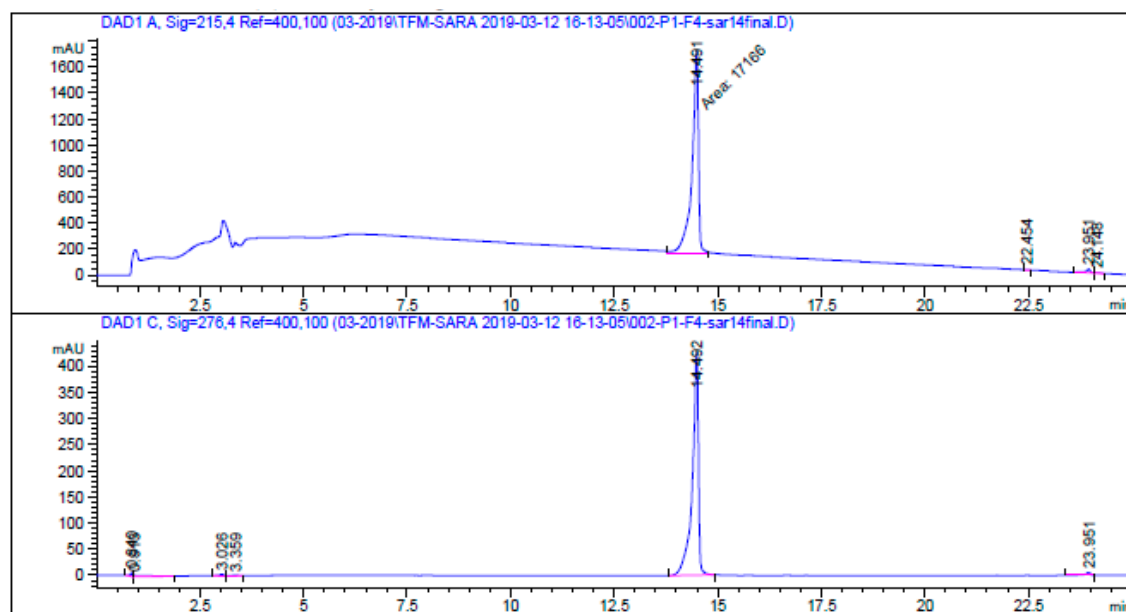

| Peak # | RetTime [min] | Type | Width [min] | Area [mAU*s] | Height [mAU] | Area %  |
|--------|---------------|------|-------------|--------------|--------------|---------|
| 1      | 14.491        | MM   | 0.1828      | 1.71660e4    | 1565.27454   | 98.6214 |
| 2      | 22.454        | BB   | 0.0959      | 12.01511     | 2.00604      | 0.0690  |
| 3      | 23.951        | BB   | 0.1030      | 195.08801    | 26.77514     | 1.1208  |
| 4      | 24.148        | BBA  | 0.1125      | 32.85143     | 4.14433      | 0.1887  |

Totals : 1.74059e4 1598.20005

Signal 2: DAD1 C, Sig=276,4 Ref=400,100

| Peak # | RetTime [min] | Type | Width [min] | Area [mAU*s] | Height [mAU] | Area %  |
|--------|---------------|------|-------------|--------------|--------------|---------|
| 1      | 0.840         | BB   | 0.0490      | 17.75322     | 5.31471      | 0.3945  |
| 2      | 0.913         | BB   | 0.2234      | 44.63164     | 2.46326      | 0.9917  |
| 3      | 3.026         | BB   | 0.0876      | 20.10593     | 3.18593      | 0.4467  |
| 4      | 3.359         | BB   | 0.1560      | 13.92740     | 1.35393      | 0.3094  |
| 5      | 14.492        | BB   | 0.1387      | 4352.80371   | 427.95197    | 96.7139 |
| 6      | 23.951        | BB   | 0.1139      | 51.48116     | 6.26349      | 1.1438  |

Totals : 4500.70307 446.53328

#### HPLC for Compound 10b

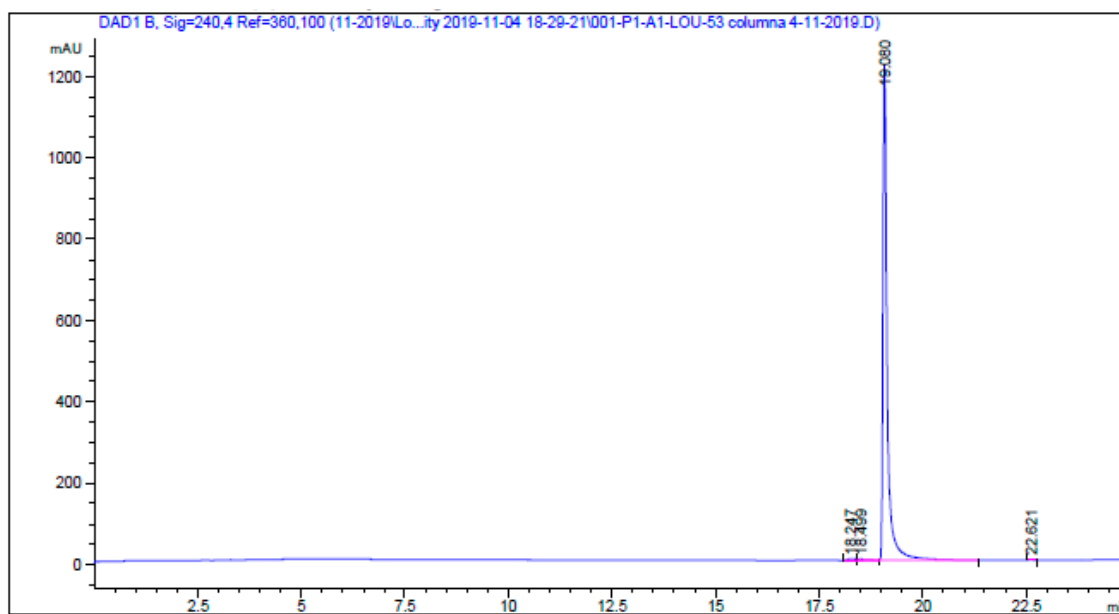

| Peak # | RetTime [min] | Type | Width [min] | Area [mAU*s] | Height [mAU] | Area %  |
|--------|---------------|------|-------------|--------------|--------------|---------|
| 1      | 18.247        | BV E | 0.2020      | 41.00013     | 2.99033      | 0.4693  |
| 2      | 18.499        | VV E | 0.2619      | 51.83469     | 2.50011      | 0.5933  |
| 3      | 19.080        | VB R | 0.1026      | 8635.04395   | 1219.69983   | 98.8448 |
| 4      | 22.621        | BB   | 0.0820      | 8.08163      | 1.52106      | 0.0925  |

Totals : 8735.96039 1226.71132

## HPLC for Compound 10c

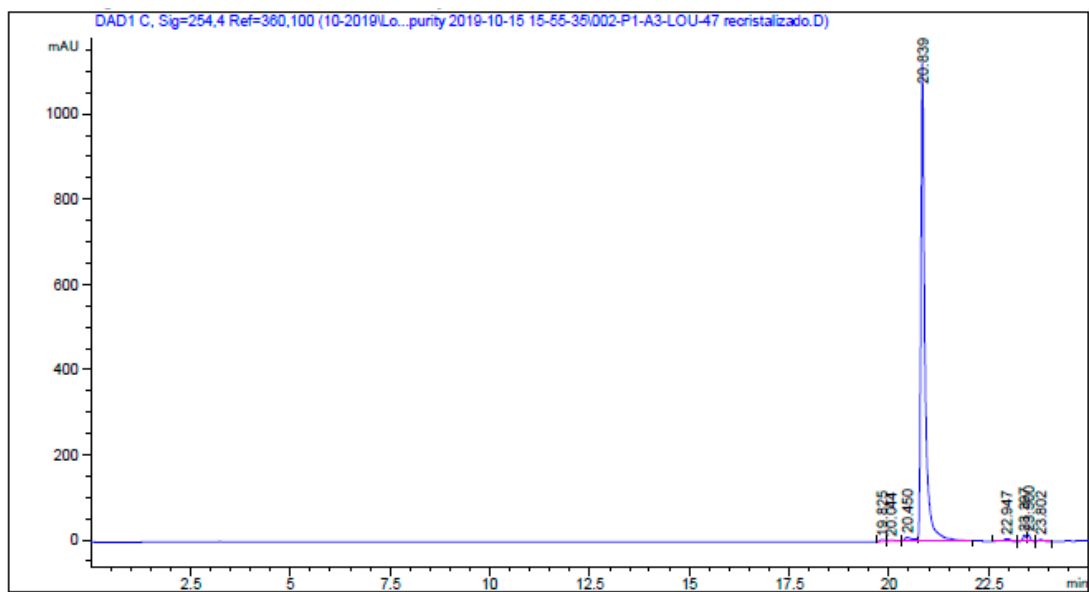

| Peak # | RetTime [min] | Type | Width [min] | Area [mAU*s] | Height [mAU] | Area % |
|--------|---------------|------|-------------|--------------|--------------|--------|
| 1      | 19.825        | BV   | 0.1249      | 33.94621     | 4.00282      | 0.3982 |
| 2      | 20.044        | VB   | 0.1706      | 27.32478     | 2.14544      | 0.3206 |

| Peak # | RetTime [min] | Type | Width [min] | Area [mAU*s] | Height [mAU] | Area %  |
|--------|---------------|------|-------------|--------------|--------------|---------|
| 3      | 20.450        | BV E | 0.2018      | 118.82546    | 8.56540      | 1.3940  |
| 4      | 20.839        | VB R | 0.1041      | 8101.08252   | 1124.42224   | 95.0401 |
| 5      | 22.947        | VB R | 0.1428      | 61.60908     | 5.67054      | 0.7228  |
| 6      | 23.397        | BV   | 0.0793      | 72.70608     | 13.84328     | 0.8530  |
| 7      | 23.500        | VV   | 0.0816      | 79.34451     | 14.56338     | 0.9309  |
| 8      | 23.802        | VB   | 0.0961      | 29.01904     | 4.56726      | 0.3404  |

Totals : 8523.85768 1177.78035

## HPLC for Compound 10d

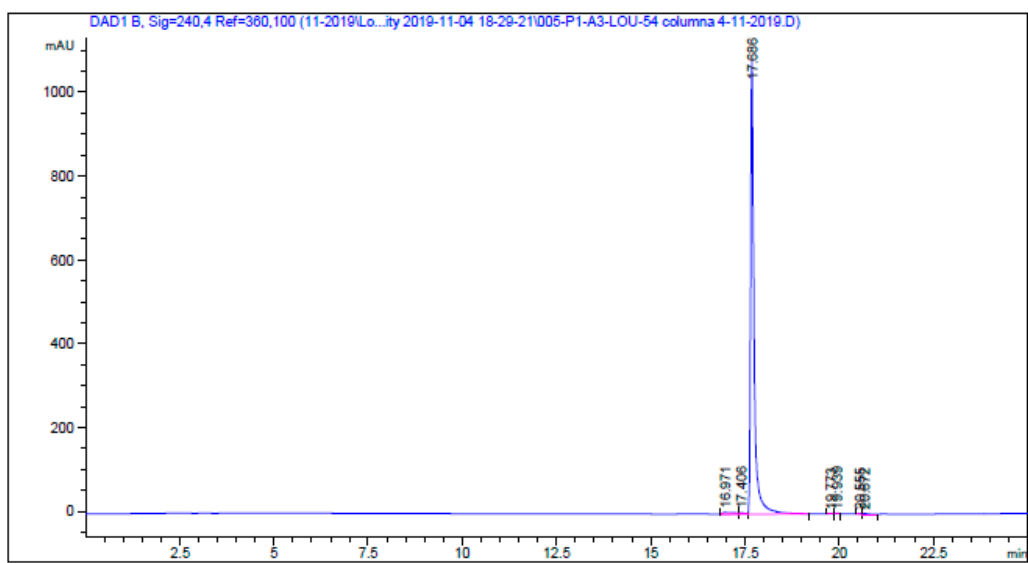

| Peak # | RetTime [min] | Type | Width [min] | Area [mAU*s] | Height [mAU] | Area %  |
|--------|---------------|------|-------------|--------------|--------------|---------|
| 1      | 16.971        | BV E | 0.2757      | 92.51758     | 4.42853      | 1.2917  |
| 2      | 17.406        | VV E | 0.1366      | 31.11412     | 3.11244      | 0.4344  |
| 3      | 17.686        | VB R | 0.0934      | 7000.71289   | 1083.49072   | 97.7423 |

| Peak # | RetTime [min] | Type | Width [min] | Area [mAU*s] | Height [mAU] | Area % |
|--------|---------------|------|-------------|--------------|--------------|--------|
| 4      | 19.773        | BV   | 0.0801      | 5.61738      | 1.08983      | 0.0784 |
| 5      | 19.939        | VB   | 0.0852      | 12.26579     | 2.26520      | 0.1713 |
| 6      | 20.555        | BV   | 0.0863      | 9.44953      | 1.66328      | 0.1319 |
| 7      | 20.672        | VB   | 0.0956      | 10.74185     | 1.61454      | 0.1500 |

### HPLC for Compound 10e

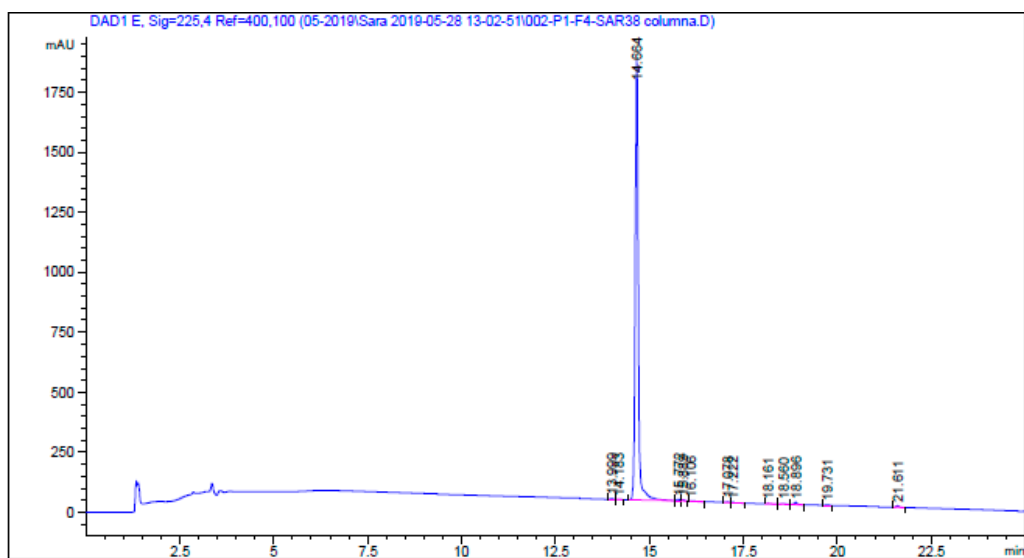

| Peak # | RetTime [min] | Type | Width [min] | Area [mAU*s] | Height [mAU] | Area % |
|--------|---------------|------|-------------|--------------|--------------|--------|
| 1      | 13.999        | BV   | 0.0754      | 17.90581     | 3.64128      | 0.1674 |
| 2      | 14.183        | VB   | 0.0914      | 6.80771      | 1.14525      | 0.0636 |

| Peak # | RetTime [min] | Type | Width [min] | Area [mAU*s] | Height [mAU] | Area %  |
|--------|---------------|------|-------------|--------------|--------------|---------|
| 3      | 14.664        | BV R | 0.0864      | 1.04494e4    | 1836.38232   | 97.6760 |
| 4      | 15.772        | BV   | 0.0795      | 32.74617     | 6.21522      | 0.3061  |
| 5      | 15.889        | VB   | 0.0746      | 24.74622     | 4.92883      | 0.2313  |
| 6      | 16.106        | BB   | 0.1176      | 12.60213     | 1.47627      | 0.1178  |
| 7      | 17.078        | BV   | 0.0856      | 11.97303     | 2.12864      | 0.1119  |
| 8      | 17.222        | VB   | 0.1257      | 10.50355     | 1.15931      | 0.0982  |
| 9      | 18.161        | BB   | 0.0884      | 9.88424      | 1.63735      | 0.0924  |
| 10     | 18.560        | BV   | 0.0952      | 20.95824     | 3.34188      | 0.1959  |
| 11     | 18.896        | VB   | 0.0857      | 51.57423     | 8.88674      | 0.4821  |
| 12     | 19.731        | BB   | 0.0817      | 14.04190     | 2.65661      | 0.1313  |
| 13     | 21.611        | BB   | 0.0853      | 34.88150     | 6.23371      | 0.3261  |

Totals : 1.06980e4 1879.83341

Figure S10. HPLC results for final compounds.
